# Supplementary material for: Evolutionary Signatures Governing the Codon Usage Bias in Coronaviruses and Their Implications for Viruses Infecting Various Bat Species
Source: MDPI journal article supplement (doi:10.3390/v13091847), 2021-09-16
Supplement: s1 [file s1]

Figure S1. A comparison of relative abundance of CpG dinucleotides between the chiroptera-hosted alpha- and beta-CoVs

Table S1. Demographics of chiroptera-hosted coronaviruses used in this study

Table S2 Relative synonymous codon usage values for the complete coding genomic sequences of chiroptera-hosted CoV
