# Supplementary material for: Evolutionary Signatures Governing the Codon Usage Bias in Coronaviruses and Their Implications for Viruses Infecting Various Bat Species
Source: MDPI journal article supplement (doi:10.3390/v13091847), 2021-09-16
Supplement: s1 [file s1]

**Table S1. Demographics of chiroptera-hosted coronaviruses used in this study**

| <b>GenBank<br/>Accession</b> | <b>Strain Name</b>                    | <b>Sequence<br/>Length</b> | <b>Collection Date</b> | <b>GenBank Host</b> | <b>Country</b> |
|------------------------------|---------------------------------------|----------------------------|------------------------|---------------------|----------------|
| MH938448                     | Bat-CoV/P.kuhlii/Italy/206645-41/2011 | 27862                      | 2011                   | Pipistrellus kuhlii | Italy          |
| MH938450                     | Bat-CoV/P.kuhlii/Italy/206679-3/2010  | 28146                      | 2010                   | Pipistrellus kuhlii | Italy          |
| MH938449                     | Bat-CoV/P.kuhlii/Italy/3398-19/2015   | 28128                      | 2015                   | Pipistrellus kuhlii | Italy          |
| NC_046964*                   | Bat-CoV/P.kuhlii/Italy/3398-19/2015   | 28128                      | 2015                   | Pipistrellus kuhlii | Italy          |
| MH687934                     | VZ_AlphaCoV_16715_23                  | 28249                      | 06/11/2014             | Scotophilus kuhlii  | Viet Nam       |
| MH687935                     | VZ_AlphaCoV_16715_24                  | 27757                      | 06/17/2014             | Scotophilus kuhlii  | Viet Nam       |
| MH687936                     | VZ_AlphaCoV_16715_31                  | 28181                      | 06/17/2014             | Scotophilus kuhlii  | Viet Nam       |
| MH687937                     | VZ_AlphaCoV_16715_32                  | 28236                      | 06/17/2014             | Scotophilus kuhlii  | Viet Nam       |
| MH687938                     | VZ_AlphaCoV_16715_39_c1               | 28349                      | 06/17/2014             | Scotophilus kuhlii  | Viet Nam       |
| MH687939                     | VZ_AlphaCoV_16715_39_c2               | 28307                      | 06/17/2014             | Scotophilus kuhlii  | Viet Nam       |
| MH687940                     | VZ_AlphaCoV_16715_45                  | 28170                      | 06/10/2014             | Scotophilus kuhlii  | Viet Nam       |
| MH687941                     | VZ_AlphaCoV_16715_47_c1               | 28008                      | 06/17/2014             | Scotophilus kuhlii  | Viet Nam       |
| MH687942                     | VZ_AlphaCoV_16715_47_c2               | 28321                      | 06/17/2014             | Scotophilus kuhlii  | Viet Nam       |
| MH687943                     | VZ_AlphaCoV_16715_5                   | 28240                      | 06/10/2014             | Scotophilus kuhlii  | Viet Nam       |
| MH687944                     | VZ_AlphaCoV_16715_53                  | 28219                      | 06/10/2014             | Scotophilus kuhlii  | Viet Nam       |
| MH687945                     | VZ_AlphaCoV_16715_56                  | 28235                      | 09/16/2014             | Scotophilus kuhlii  | Viet Nam       |
| MH687946                     | VZ_AlphaCoV_16715_61                  | 28173                      | 06/10/2014             | Scotophilus kuhlii  | Viet Nam       |
| MH687947                     | VZ_AlphaCoV_16715_63                  | 22363                      | 06/17/2014             | Scotophilus kuhlii  | Viet Nam       |
| MH687948                     | VZ_AlphaCoV_16715_7                   | 28255                      | 06/11/2014             | Scotophilus kuhlii  | Viet Nam       |
| MH687949                     | VZ_AlphaCoV_16715_76                  | 28185                      | 06/10/2014             | Scotophilus kuhlii  | Viet Nam       |
| MH687950                     | VZ_AlphaCoV_16715_77                  | 28155                      | 06/10/2014             | Scotophilus kuhlii  | Viet Nam       |
| MH687951                     | VZ_AlphaCoV_16715_78                  | 28313                      | 06/11/2014             | Scotophilus kuhlii  | Viet Nam       |
| MH687952                     | VZ_AlphaCoV_16715_84                  | 27225                      | 06/10/2014             | Scotophilus kuhlii  | Viet Nam       |

|            |                             |       |            |                           |          |
|------------|-----------------------------|-------|------------|---------------------------|----------|
| MH687953   | VZ_AlphaCoV_16715_86        | 23258 | 06/11/2014 | Scotophilus kuhlii        | Viet Nam |
| MH687954   | VZ_AlphaCoV_16845_24        | 28240 | 09/18/2014 | Scotophilus kuhlii        | Viet Nam |
| MH687955   | VZ_AlphaCoV_16845_47        | 28219 | 09/17/2014 | Scotophilus kuhlii        | Viet Nam |
| MH687956   | VZ_AlphaCoV_16845_53        | 28050 | 09/16/2014 | Scotophilus kuhlii        | Viet Nam |
| MH687957   | VZ_AlphaCoV_16845_64        | 28173 | 09/18/2014 | Scotophilus kuhlii        | Viet Nam |
| MH687958   | VZ_AlphaCoV_16845_87        | 28036 | 09/18/2014 | Scotophilus kuhlii        | Viet Nam |
| MH687959   | VZ_AlphaCoV_17819_17        | 28169 | 11/12/2014 | Scotophilus kuhlii        | Viet Nam |
| MH687960   | VZ_AlphaCoV_17819_22        | 27303 | 11/13/2014 | Scotophilus kuhlii        | Viet Nam |
| MH687961   | VZ_AlphaCoV_17819_4         | 28168 | 11/13/2014 | Scotophilus kuhlii        | Viet Nam |
| MH687962   | VZ_AlphaCoV_17819_50        | 27752 | 11/13/2014 | Scotophilus kuhlii        | Viet Nam |
| MH687963   | VZ_AlphaCoV_20724_95        | 28169 | 02/06/2015 | Scotophilus kuhlii        | Viet Nam |
| MH687964   | VZ_AlphaCoV_20745_10        | 28210 | 02/06/2015 | Scotophilus kuhlii        | Viet Nam |
| MH687965   | VZ_AlphaCoV_20745_17        | 28115 | 02/13/2015 | Scotophilus kuhlii        | Viet Nam |
| MH687966   | VZ_AlphaCoV_20745_6         | 28389 | 02/06/2015 | Scotophilus kuhlii        | Viet Nam |
| MH687967   | VZ_AlphaCoV_20745_8         | 27726 | 02/06/2015 | Scotophilus kuhlii        | Viet Nam |
| MN065811   | BtCoV/008_16/M.bra/FIN/2016 | 28119 | 08/15/2016 | Myotis brandtii           | Finland  |
| MG923574   | BtCoV/020_16/M.dau/FIN/2016 | 28045 | 08/28/2016 | Myotis daubentonii        | Finland  |
| NC_022103* | bat/USA/CDPHE15/2006        | 28035 | 08/07/2006 | Myotis lucifugus          | USA      |
| KY799179   | UNKNOWN-KY799179            | 28173 | 11/2010    | Myotis lucifugus          | Canada   |
| KJ473806   | BtMr-SAX2011                | 27935 | 2011       | Myotis ricketti           | China    |
| NC_028811* | BtMr-SAX2011                | 27935 | 2011       | Myotis ricketti           | China    |
| KJ473809   | BtNv-SC2013                 | 27783 | 2013       | Nyctalus velutinus        | China    |
| NC_028833* | BtNv-SC2013                 | 27783 | 2013       | Nyctalus velutinus        | China    |
| KJ473810   | BtMs-GS2013                 | 27576 | 2013       | Myotis sp.                | China    |
| KJ473807   | BtRf-HuB2013                | 27608 | 2013       | Rhinolophus ferrumequinum | China    |
| NC_028814* | BtRf-HuB2013                | 27608 | 2013       | Rhinolophus ferrumequinum | China    |
| KJ473808   | BtRf-YN2012                 | 26975 | 2012       | Rhinolophus ferrumequinum | China    |

|            |                       |       |            |                           |           |
|------------|-----------------------|-------|------------|---------------------------|-----------|
| NC_028824* | BtRf-YN2012           | 26975 | 2012       | Rhinolophus ferrumequinum | China     |
| MK211373   | BtRs-AlphaCoV/YN2018  | 29109 | 05/2017    | Cynopterus sphinx         | China     |
| MK211369   | BtSk-AlphaCoV/GX2018A | 28303 | 05/2017    | Scotophilus kuhlii        | China     |
| MK211370   | BtSk-AlphaCoV/GX2018B | 28175 | 05/2017    | Scotophilus kuhlii        | China     |
| MK211371   | BtSk-AlphaCoV/GX2018C | 28146 | 05/2017    | Scotophilus kuhlii        | China     |
| MK211372   | BtSk-AlphaCoV/GX2018D | 28238 | 05/2017    | Scotophilus kuhlii        | China     |
| MN611525   | CHB0025               | 28169 | 03/2018    | Hipposideros larvatus     | China     |
| MN611523   | 160942                | 28514 | 03/2018    | Hipposideros pomona       | China     |
| MN611518   | 6610                  | 28751 | 03/2018    | Miniopterus pusillus      | China     |
| MN611524   | 161454                | 28316 | 03/2018    | Miniopterus schreibersii  | China     |
| KY073746   | BtKYNL63-15           | 28442 | 08/06/2008 | Triaenops afer            | Kenya     |
| KY073744   | BtKYNL63-9a           | 28363 | 06/21/2010 | Triaenops afer            | Kenya     |
| NC_032107* | BtKYNL63-9a           | 28363 | 06/21/2010 | Triaenops afer            | Kenya     |
| KY073745   | BtKYNL63-9b           | 28679 | 06/21/2010 | Triaenops afer            | Kenya     |
| NC_048216* | BtKYNL63-9b           | 28679 | 06/21/2010 | Triaenops afer            | Kenya     |
| MN611522   | 160660                | 26956 | 03/2018    | Rhinolophus affinis       | China     |
| MK720945   | TLC26A                | 29201 | 08/06/2015 | Rhinolophus sinicus       | Hong Kong |
| MK720946   | TLC28A                | 29201 | 08/06/2015 | Rhinolophus sinicus       | Hong Kong |
| MN611517   | 5425                  | 27619 | 03/2018    | Rousettus aegyptiacus     | Kenya     |
| MN611521   | HK140714              | 27933 | 03/2018    | Scotophilus kuhlii        | China     |
| MK720944   | GZ151867              | 27636 | 09/09/2015 | Tylonycteris robustula    | China     |
| KJ473795   | BtMf-AH2011           | 28310 | 2011       | Miniopterus fuliginosus   | China     |
| KJ473796   | BtMf-JX2012           | 28311 | 2012       | Miniopterus fuliginosus   | China     |
| KF430219   | bat/USA/CDPHE15/2006  | 28035 | 08/07/2006 | Myotis lucifugus          | USA       |
| JQ989269   | LSH5A                 | 28492 | 12/2005    | bat                       | Hong Kong |
| JQ989267   | SL12A                 | 28483 | 12/2006    | bat                       | Hong Kong |
| JQ989268   | TLC1310A              | 28483 | 10/2006    | bat                       | Hong Kong |

|            |                                       |       |            |                         |              |
|------------|---------------------------------------|-------|------------|-------------------------|--------------|
| JQ989272   | TLC1343A                              | 28483 | 08/2010    | bat                     | Hong Kong    |
| JQ989273   | TLC1347A                              | 28483 | 08/2010    | bat                     | Hong Kong    |
| JQ989266   | TT3A                                  | 28483 | 12/2006    | bat                     | Hong Kong    |
| JQ989271   | 175A                                  | 28489 | 10/2005    | bat                     | China        |
| JQ989270   | 183A                                  | 28494 | 10/2005    | bat                     | China        |
| NC_018871* | 183A                                  | 28494 | 10/2005    | bat                     | China        |
| KT253272   | BtCoV/AT1A-F1/Hip_aba/GHA/2010        | 28688 | 2010       | Hipposideros abae       | Ghana        |
| KT253270   | BtCoV/FO1A-F2/Hip_aba/GHA/2010        | 28020 | 2010       | Hipposideros abae       | Ghana        |
| KT253269   | BtCoV/KW2E-F151/Hip_cf._rub/GHA/2011  | 28026 | 2011       | Hipposideros cf. ruber  | Ghana        |
| KT253271   | BtCoV/KW2E-F56/Hip_cf._rub/GHA/2011   | 28754 | 2011       | Hipposideros cf. ruber  | Ghana        |
| KY073747   | BtKY229E-1                            | 27837 | 06/20/2009 | Hipposideros sp.        | Kenya        |
| KY073748   | BtKY229E-8                            | 27636 | 06/2010    | Hipposideros vittatus   | Kenya        |
| KJ473799   | BtMf-FJ2012                           | 28765 | 2012       | Miniopterus fuliginosus | China        |
| KJ473797   | BtMf-GD2012                           | 28758 | 2012       | Miniopterus fuliginosus | China        |
| KJ473800   | BtMf-HeN2013                          | 28735 | 2013       | Miniopterus fuliginosus | China        |
| KJ473798   | BtMf-HuB2013                          | 28755 | 2013       | Miniopterus fuliginosus | China        |
| NC_025217* | Zhejiang2013                          | 31491 | 04/29/2013 | Hipposideros pratti     | China        |
| MK211374   | BtRI-BetaCoV/SC2018                   | 29648 | 08/2016    | Rhinolophus sp.         | China        |
| MK211375   | BtRs-BetaCoV/YN2018A                  | 29698 | 09/2016    | Rhinolophus affinis     | China        |
| MK211376   | BtRs-BetaCoV/YN2018B                  | 30256 | 09/2016    | Rhinolophus affinis     | China        |
| MK211377   | BtRs-BetaCoV/YN2018C                  | 29689 | 09/2016    | Rhinolophus affinis     | China        |
| MK211378   | BtRs-BetaCoV/YN2018D                  | 30213 | 09/2016    | Rhinolophus affinis     | China        |
| MK211379   | BtRt-BetaCoV/GX2018                   | 29752 | 09/2016    | Rhinolophus affinis     | China        |
| KJ473821   | UNKNOWN-KJ473821                      | 30423 | -N/A-      | Vespertilio superans    | China        |
| MG596802   | Bat-CoV/H.savii/Italy/206645-40/2011  | 30048 | 2011       | Hypsugo savii           | Italy        |
| MG596803   | Bat-CoV/P.khulii/Italy/206645-63/2011 | 30039 | 2011       | Pipistrellus kuhlii     | Italy        |
| MF593268   | Neoromicia/5038                       | 30009 | 04/20/2015 | Neoromicia capensis     | South Africa |

|            |                              |       |            |                           |              |
|------------|------------------------------|-------|------------|---------------------------|--------------|
| MN611520   | BY140568                     | 30511 | 03/2018    | Pipistrellus abramus      | China        |
| NC_030886* | GCCDC1 356                   | 30161 | 05/28/2014 | Rousettus leschenaulti    | China        |
| MT350598   | GCCDC1                       | 30162 | 10/2016    | Eonycteris spelaea        | Singapore    |
| KT444582   | WIV16                        | 30290 | 07/21/2013 | Rhinolophus sinicus       | China        |
| JX993988   | Cp/Yunnan2011                | 29452 | 2011       | Chaerephon plicata        | China        |
| JX993987   | Rp/Shaanxi2011               | 29484 | 09/2011    | Rhinolophus pusillus      | China        |
| KJ473812   | BtRf-HeB2013                 | 29443 | 2013       | Rhinolophus ferrumequinum | China        |
| KJ473811   | BtRf-JL2012                  | 29037 | 2012       | Rhinolophus ferrumequinum | China        |
| KJ473813   | BtRf-SX2013                  | 29461 | 2013       | Rhinolophus ferrumequinum | China        |
| KJ473815   | BtRs-GX2013                  | 29161 | 2013       | Rhinolophus sinicus       | China        |
| KJ473814   | BtRs-HuB2013                 | 29658 | 2013       | Rhinolophus sinicus       | China        |
| KJ473816   | BtRs-YN2013                  | 29142 | 2013       | Rhinolophus sinicus       | China        |
| MN611519   | GZ131656                     | 30224 | 03/2018    | Tylonycteris pachypus     | China        |
| KF636752   | Zhejiang2013                 | 31491 | 04/29/2013 | Hipposideros pratti       | China        |
| KC869678   | Neoromicia/PML-PHE1/RSA/2011 | 30111 | 2011       | Neoromicia capensis       | South Africa |
| EF065510   | TT03f                        | 30488 | -N/A-      | bat                       | China        |
| EF065511   | TT06f                        | 30488 | -N/A-      | bat                       | China        |
| EF065512   | TT07f                        | 30487 | -N/A-      | bat                       | China        |
| EF065509   | LMH03f                       | 30482 | -N/A-      | bat                       | China        |
| KJ473820   | BtPa-GD2013                  | 30480 | 2013       | Pipistrellus abramus      | China        |
| NC_009020* | HKU5-1 LMH03f                | 30482 | -N/A-      | bat                       | China        |
| EF065514   | BF_017I                      | 29107 | -N/A-      | bat                       | China        |
| EF065515   | BF_493I                      | 29136 | -N/A-      | bat                       | China        |
| EF065516   | BF_141I                      | 29155 | -N/A-      | bat                       | China        |
| EF065513   | BF_005I                      | 29114 | -N/A-      | bat                       | China        |
| HM211100   | UNKNOWN-HM211100             | 29136 | 04/10/2006 | bat BF_506I               | China        |
| HM211101   | UNKNOWN-HM211101             | 29122 | 04/10/2006 | bat BF_506I               | China        |

|            |                             |       |            |                           |       |
|------------|-----------------------------|-------|------------|---------------------------|-------|
| HM211098   | UNKNOWN-HM211098            | 29136 | 12/11/2005 | bat BF_258I               | China |
| HM211099   | UNKNOWN-HM211099            | 29112 | 12/11/2005 | bat BF_258I               | China |
| NC_009021* | HKU9-1 BF_005I              | 29114 | -N/A-      | bat                       | China |
| MG762674   | Rousettus spp/Jinghong/2009 | 29134 | 11/01/2009 | Rousettus sp.             | China |
| DQ022305   | HKU3-1                      | 29728 | -N/A-      | -N/A-                     | China |
| DQ412042   | Rf1                         | 29709 | -N/A-      | Rhinolophus ferrumequinum | -N/A- |
| DQ412043   | Rm1                         | 29749 | -N/A-      | Rhinolophus macrotis      | -N/A- |
| DQ071615   | Rp3                         | 29736 | -N/A-      | bat                       | China |
| MN996532   | RaTG13                      | 29855 | 07/24/2013 | Rhinolophus affinis       | China |
| KY417142   | As6526                      | 29725 | 05/12/2014 | Aselliscus stoliczkanus   | China |
| MG772933   | bat-SL-CoVZC45              | 29802 | 02/2017    | Rhinolophus pusillus      | China |
| MG772934   | bat-SL-CoVZXC21             | 29732 | 07/2015    | Rhinolophus pusillus      | China |
| KF294457   | Longquan-140                | 29676 | 2012       | Rhinolophus monoceros     | China |
| KY417145   | Rf4092                      | 29710 | 09/18/2012 | Rhinilophus ferrumequinum | China |
| KY417143   | Rs4081                      | 29741 | 09/18/2012 | Rhinolophus sinicus       | China |
| KY417144   | Rs4084                      | 29770 | 09/18/2012 | Rhinolophus sinicus       | China |
| KY417146   | Rs4231                      | 29782 | 04/17/2013 | Rhinolophus sinicus       | China |
| KY417147   | Rs4237                      | 29741 | 04/17/2013 | Rhinolophus sinicus       | China |
| KY417148   | Rs4247                      | 29743 | 04/17/2013 | Rhinolophus sinicus       | China |
| KY417149   | Rs4255                      | 29743 | 04/17/2013 | Rhinolophus sinicus       | China |
| KY417150   | Rs4874                      | 30311 | 07/21/2013 | Rhinolophus sinicus       | China |
| KY417151   | Rs7327                      | 30307 | 10/24/2014 | Rhinolophus sinicus       | China |
| KY417152   | Rs9401                      | 29769 | 10/16/2015 | Rhinolophus sinicus       | China |
| KC881006   | Rs3367                      | 29792 | 03/19/2012 | Rhinolophus sinicus       | China |
| KC881005   | RsSHC014                    | 29787 | 04/17/2011 | Rhinolophus sinicus       | China |
| KF367457   | WIV1                        | 30309 | 09/2012    | Rhinolophus sinicus       | China |
| KP886808   | YNLF_31C                    | 29723 | 05/23/2013 | Rhinolophus Ferrumequinum | China |

|            |             |       |            |                           |           |
|------------|-------------|-------|------------|---------------------------|-----------|
| KP886809   | YNLF_34C    | 29723 | 05/23/2013 | Rhinolophus Ferrumequinum | China     |
| KF569996   | LYRa11      | 29805 | 2011       | Rhinolophus affinis       | China     |
| FJ588686   | Rs672       | 29059 | 2006       | Rhinolophus sinicus       | China     |
| KY352407   | BtKY72      | 29274 | 08/2007    | Rhinolophus sp. (bat)     | Kenya     |
| KU973692   | F46         | 29722 | 2012       | bat                       | China     |
| LC556375   | Rc-o319     | 29718 | 2013       | Rhinolophus cornutus      | Japan     |
| EF065506   | B05f        | 30286 | -N/A-      | bat                       | China     |
| EF065507   | B07f        | 30286 | -N/A-      | bat                       | China     |
| EF065508   | LMH1f       | 30316 | -N/A-      | bat                       | China     |
| EF065505   | B04f        | 30286 | -N/A-      | bat                       | China     |
| KJ473822   | BtTp-GX2012 | 30247 | 2012       | Tylonycteris pachypus     | China     |
| NC_009019* | HKU4-1 B04f | 30286 | -N/A-      | bat                       | China     |
| MW218395   | SM3A        | 30248 | 08/16/2010 | Tylonycteris pachypus     | Hong Kong |
| KX442565   | NL140462    | 30497 | 05/08/2014 | Hypsugo pulveratus        | China     |
| KX442564   | YD131305    | 30498 | 09/14/2013 | Hypsugo pulveratus        | China     |
| KU762338   | GCCDC1 356  | 30161 | 05/28/2014 | Rousettus leschenaulti    | China     |
| MF094687   | 141388      | 27174 | -N/A-      | Rhinolophus sp.           | China     |
| MF094688   | 162140      | 27177 | -N/A-      | Rhinolophus sp.           | China     |
| MF094685   | 8462        | 27200 | -N/A-      | Rhinolophus sp.           | China     |
| MF094686   | 8495        | 27198 | -N/A-      | Rhinolophus sp.           | China     |
| KY770858   | Anlong-103  | 29688 | 2013       | Rhinolophus sinicus       | China     |
| KY770859   | Anlong-112  | 29667 | 2013       | Rhinolophus sinicus       | China     |
| KY770850   | Anlong-43   | 26883 | 2013       | Myotis siligorensis       | China     |
| KY770851   | Anlong-57   | 28096 | 2013       | Myotis davidii            | China     |
| MK492263   | BtCoV92     | 29585 | 2015       | Cynopterus brachyotis     | Singapore |
| MG693170   | CMR66       | 29123 | 12/2013    | Eidolon helvum            | Cameroon  |
| MG693168   | CMR704-P12  | 28975 | 12/2013    | Eidolon helvum            | Cameroon  |

|            |                        |       |            |                                                                   |          |
|------------|------------------------|-------|------------|-------------------------------------------------------------------|----------|
| NC_048212* | CMR704-P12             | 28975 | 12/2013    | Eidolon helvum                                                    | Cameroon |
| MG693172   | CMR705-P13             | 28958 | 12/2013    | Eidolon helvum                                                    | Cameroon |
| MG693169   | CMR900                 | 28989 | 12/2013    | Eidolon helvum                                                    | Cameroon |
| KY770860   | Jiyuan-84              | 29651 | 2012       | Rhinolophus ferrumequinum                                         | China    |
| KU182965   | JPDB144                | 30321 | 12/2012    | Myotis daubentonii                                                | China    |
| KU182964   | JTMC15                 | 28761 | 08/2013    | Rhinolophus ferrumequinum                                         | China    |
| KX574227   | PREDICT/PDF-2180       | 29642 | 02/20/2013 | Pipistrellus cf. hesperidus; specimen<br>voucher: OTBA03-20130220 | Uganda   |
| NC_034440* | PREDICT/PDF-2180       | 29642 | 02/20/2013 | Pipistrellus cf. hesperidus; specimen<br>voucher: OTBA03-20130220 | Uganda   |
| LC469308   | Vs-CoV-1               | 29930 | -N/A-      | Vespertilio sinensis                                              | Japan    |
| GU190215   | BtCoV/BM48-31/BGR/2008 | 29276 | 2008       | Rhinolophus blasii                                                | Bulgaria |
| NC_014470* | BtCoV/BM48-31/BGR/2008 | 29276 | 2008       | Rhinolophus blasii                                                | Bulgaria |

---
