# Supplementary material for: Evolutionary Signatures Governing the Codon Usage Bias in Coronaviruses and Their Implications for Viruses Infecting Various Bat Species
Source: Viruses. 2021 Sep 16;13(9):1847. doi: 10.3390/v13091847 (PMC8473330; doi:10.3390/v13091847)
Supplement: Supplementary file 1 [file viruses-13-01847-s001.zip]

Archive with 4 entries (4 files):
- Figure S1.tif
- Supplementary information captions.pdf
- Table S1.pdf
- Table S2.xlsx
