# Supplementary material for: Evolutionary Signatures Governing the Codon Usage Bias in Coronaviruses and Their Implications for Viruses Infecting Various Bat Species
Source: Viruses. 2021 Sep 16;13(9):1847. doi: 10.3390/v13091847 (PMC8473330; doi:10.3390/v13091847)
Supplement: Supplementary file 1 [file viruses-13-01847-s001.zip › Table S2.xlsx]

## Sheet: Sheet1
	Table S2	Relative synonymous codon usage values for the complete coding genomic sequences of chiroptera-hosted CoV
	Subgenera	SeqName	GCU	GCG	GCC	GCA	UGU	UGC	GAU	GAC	GAG	GAA	UUU	UUC	GGU	GGG	GGC	GGA	CAC	CAU	AUU	AUA	AUC	AAA	AAG	CUA	CUC	CUG	CUU	UUA	UUG	AUG	AAC	AAU	CCA	CCC	CCU	CCG	CAA	CAG	AGA	AGG	CGA	CGC	CGG	CGU	AGC	AGU	UCA
			A	A	A	A	C	C	D	D	E	E	F	F	G	G	G	G	H	H	I	I	I	K	K	L	L	L	L	L	L	M	N	N	P	P	P	P	Q	Q	R	R	R	R	R	R	S	S	S
	Colacovirus	Bat_USA_CDPHE15_2006_NC_022103	1.86708	0.25348	0.67388	1.20556	1.53094	0.46906	1.20696	0.79304	1.01458	0.98542	1.60777	0.39223	2.60377	0.18239	0.81761	0.39623	0.50829	1.49171	1.77209	0.83023	0.39767	0.85714	1.14286	0.5805	0.54422	0.6712	2.20408	0.64499	1.35501	1	0.69636	1.30364	1.50147	0.39883	1.94721	0.15249	0.86121	1.13879	0.98592	1.01408	0.26415	1	0.20755	2.5283	0.42678	1.57322	1.15982
	Colacovirus	UNKNOWN-KY799179_KY799179	1.96641	0.21374	0.60458	1.21527	1.52751	0.47249	1.22244	0.77756	1.02857	0.97143	1.58607	0.41393	2.70947	0.16693	0.72552	0.39807	0.50549	1.49451	1.76471	0.83294	0.40235	0.84233	1.15767	0.57014	0.56109	0.66968	2.1991	0.70752	1.29248	1	0.69106	1.30894	1.46199	0.42105	1.92982	0.18713	0.84912	1.15088	1.05714	0.94286	0.28986	0.98551	0.28986	2.43478	0.45415	1.54585	1.17489
	Colacovirus	Bat_USA_CDPHE15_2006_KF430219	1.87106	0.25187	0.65967	1.21739	1.54088	0.45912	1.19924	0.80076	1.0226	0.9774	1.60985	0.39015	2.60921	0.17831	0.82021	0.39227	0.49215	1.50785	1.75281	0.85618	0.39101	0.85097	1.14903	0.57018	0.53509	0.65789	2.23684	0.66319	1.33681	1	0.69126	1.30874	1.49856	0.40346	1.94813	0.14986	0.86897	1.13103	1.01351	0.98649	0.26047	1.00465	0.20465	2.53023	0.42915	1.57085	1.16814
	Decacovirus	BtMs-AlphaCoV_GS2013_KJ473810	2.10309	0.24742	0.39175	1.25773	1.52688	0.47312	1.27033	0.72967	0.63	1.37	1.36382	0.63618	2.50435	0.12522	0.61217	0.75826	0.63576	1.36424	1.86296	0.53319	0.60385	1.27509	0.72491	0.59113	0.54187	0.59113	2.27586	0.8	1.2	1	0.68991	1.31009	1.43949	0.24204	2.10191	0.21656	1.29329	0.70671	1.54098	0.45902	0.48485	0.87273	0.19394	2.44848	0.4661	1.5339	1.32701
	Decacovirus	BtRf-AlphaCoV_HuB2013_KJ473807	2.08547	0.22564	0.42393	1.26496	1.58596	0.41404	1.25813	0.74187	0.64662	1.35338	1.44078	0.55922	2.64384	0.13699	0.55479	0.66438	0.61538	1.38462	1.81425	0.63499	0.55076	1.29799	0.70201	0.57568	0.5062	0.55583	2.36228	0.76536	1.23464	1	0.64071	1.35929	1.45679	0.2716	2.06173	0.20988	1.31488	0.68512	1.56303	0.43697	0.42604	0.78107	0.18935	2.60355	0.45455	1.54545	1.18203
	Decacovirus	BtRf-AlphaCoV_HuB2013_NC_028814	2.08547	0.22564	0.42393	1.26496	1.58596	0.41404	1.25813	0.74187	0.64662	1.35338	1.44078	0.55922	2.64384	0.13699	0.55479	0.66438	0.61538	1.38462	1.81425	0.63499	0.55076	1.29799	0.70201	0.57568	0.5062	0.55583	2.36228	0.76536	1.23464	1	0.64071	1.35929	1.45679	0.2716	2.06173	0.20988	1.31488	0.68512	1.56303	0.43697	0.42604	0.78107	0.18935	2.60355	0.45455	1.54545	1.18203
	Decacovirus	BtRs-AlphaCoV_YN2018_MK211373	2.04167	0.26389	0.53472	1.15972	1.37241	0.62759	1.2093	0.7907	1.14121	0.85879	1.44578	0.55422	2.52487	0.18525	0.83019	0.45969	0.67925	1.32075	1.71021	0.7981	0.49169	0.78492	1.21508	0.58851	0.71724	0.68046	2.01379	0.8381	1.1619	1	0.70757	1.29243	1.68098	0.52761	1.49693	0.29448	0.88571	1.11429	1.16129	0.83871	0.54106	0.86957	0.3285	2.26087	0.44444	1.55556	1.0936
	Decacovirus	Hipposideros_pomona_bat_coronavirus_CHB25_MN611525	2.12437	0.20168	0.61176	1.06218	1.5534	0.4466	1.27237	0.72763	0.72289	1.27711	1.59768	0.40232	2.69831	0.18983	0.79322	0.31864	0.67052	1.32948	1.76017	0.88651	0.35332	1.19615	0.80385	0.63357	0.41608	0.57683	2.37352	0.78404	1.21596	1	0.68379	1.31621	1.27327	0.58859	1.8979	0.24024	1.36184	0.63816	1.17117	0.82883	0.30435	0.93478	0.17391	2.58696	0.36	1.64	1.10118
	Decacovirus	Hipposideros_pomona_bat_coronavirus_HKU10-related_160942_MN611523	2.14503	0.1484	0.59359	1.11298	1.60137	0.39863	1.23305	0.76695	0.68254	1.31746	1.625	0.375	2.85614	0.12632	0.69474	0.32281	0.56287	1.43713	1.96154	0.76282	0.27564	1.19409	0.80591	0.42453	0.45283	0.58491	2.53774	0.69542	1.30458	1	0.69517	1.30483	1.33333	0.32464	2.15652	0.18551	1.35016	0.64984	1.46269	0.53731	0.41618	0.76301	0.23121	2.5896	0.45045	1.54955	1.09434
	Decacovirus	Rhinolophus_bat_coronavirus_HKU32_TLC26A_MK720945	2.04214	0.31767	0.5316	1.10859	1.48949	0.51051	1.24409	0.75591	1.01449	0.98551	1.49814	0.50186	2.76874	0.17863	0.69537	0.35726	0.64481	1.35519	1.66049	0.75309	0.58642	0.95885	1.04115	0.59539	0.61216	0.57862	2.21384	0.75603	1.24397	1	0.71298	1.28702	1.45665	0.33526	1.86127	0.34682	1.12131	0.87869	1.21311	0.78689	0.46018	0.79646	0.21239	2.53097	0.44622	1.55378	1.06966
	Decacovirus	Rhinolophus_bat_coronavirus_HKU32_TLC28A_MK720946	2.04214	0.31767	0.5316	1.10859	1.48949	0.51051	1.24409	0.75591	1.01449	0.98551	1.49442	0.50558	2.77316	0.17252	0.69649	0.35783	0.64481	1.35519	1.65773	0.75464	0.58763	0.96296	1.03704	0.59539	0.61216	0.587	2.20545	0.75806	1.24194	1	0.70932	1.29068	1.45665	0.33526	1.86127	0.34682	1.12131	0.87869	1.21311	0.78689	0.46018	0.81416	0.21239	2.51327	0.44622	1.55378	1.06966
	Decacovirus	Hipposideros_bat_coronavirus_HKU10-LSH5A_JQ989269	2.19737	0.18421	0.59211	1.02632	1.5298	0.4702	1.22981	0.77019	0.66838	1.33162	1.62264	0.37736	2.90141	0.07746	0.66901	0.35211	0.56	1.44	1.93608	0.74845	0.31546	1.22963	0.77037	0.45176	0.47059	0.50824	2.56941	0.75743	1.24257	1	0.75092	1.24908	1.22093	0.32558	2.2093	0.24419	1.33934	0.66066	1.37415	0.62585	0.43182	1.02273	0.13636	2.40909	0.46753	1.53247	1.05695
	Decacovirus	Hipposideros_bat_coronavirus_HKU10-SL12A_JQ989267	2.20667	0.18	0.58667	1.02667	1.53846	0.46154	1.22594	0.77406	0.66667	1.33333	1.62934	0.37066	2.91873	0.07774	0.66431	0.33922	0.55172	1.44828	1.94628	0.7438	0.30992	1.2365	0.7635	0.47002	0.47962	0.48921	2.56115	0.74314	1.25686	1	0.75092	1.24908	1.21994	0.32845	2.20528	0.24633	1.34743	0.65257	1.38356	0.61644	0.41379	1.03448	0.13793	2.41379	0.45815	1.54185	1.05936
	Decacovirus	Hipposideros_bat_coronavirus_HKU10-TLC1310A_JQ989268	2.20395	0.18421	0.58553	1.02632	1.53135	0.46865	1.23077	0.76923	0.67352	1.32648	1.62335	0.37665	2.91037	0.07733	0.66784	0.34446	0.56818	1.43182	1.94479	0.74233	0.31288	1.22963	0.77037	0.46226	0.4717	0.50943	2.5566	0.75248	1.24752	1	0.75735	1.24265	1.21283	0.31487	2.22741	0.2449	1.34337	0.65663	1.37415	0.62585	0.43182	1.02273	0.13636	2.40909	0.46753	1.53247	1.06364
	Decacovirus	Hipposideros_bat_coronavirus_HKU10-TLC1343A_JQ989272	2.19699	0.16694	0.61436	1.0217	1.56863	0.43137	1.21237	0.78763	0.67692	1.32308	1.61959	0.38041	2.84007	0.07733	0.70299	0.37961	0.53714	1.46286	1.9375	0.74375	0.31875	1.26568	0.73432	0.47393	0.45498	0.45498	2.61611	0.72953	1.27047	1	0.72928	1.27072	1.22543	0.31214	2.21965	0.24277	1.34743	0.65257	1.39726	0.60274	0.43429	1.00571	0.16	2.4	0.44444	1.55556	1.13258
	Decacovirus	Hipposideros_bat_coronavirus_HKU10-TLC1347A_JQ989273	2.19398	0.16722	0.61538	1.02341	1.56863	0.43137	1.21237	0.78763	0.67692	1.32308	1.61582	0.38418	2.85114	0.07706	0.70053	0.37128	0.53714	1.46286	1.94154	0.73904	0.31942	1.26568	0.73432	0.47281	0.4539	0.4539	2.61939	0.73134	1.26866	1	0.72928	1.27072	1.22899	0.31304	2.21449	0.24348	1.34743	0.65257	1.39726	0.60274	0.43429	1.00571	0.16	2.4	0.44444	1.55556	1.13258
	Decacovirus	Hipposideros_bat_coronavirus_HKU10-TT3A_JQ989266	2.20667	0.18	0.58667	1.02667	1.53846	0.46154	1.22756	0.77244	0.66667	1.33333	1.62934	0.37066	2.91873	0.07774	0.66431	0.33922	0.55172	1.44828	1.94628	0.7438	0.30992	1.2365	0.7635	0.47115	0.48077	0.49038	2.55769	0.74314	1.25686	1	0.75229	1.24771	1.21994	0.32845	2.20528	0.24633	1.34743	0.65257	1.38356	0.61644	0.41379	1.03448	0.13793	2.41379	0.45815	1.54185	1.05936
	Decacovirus	Rousettus_bat_coronavirus_HKU10-175A_JQ989271	2.12437	0.20168	0.56471	1.10924	1.57655	0.42345	1.23849	0.76151	0.71768	1.28232	1.59073	0.40927	2.89608	0.0954	0.67462	0.3339	0.65556	1.34444	1.93187	0.74505	0.32308	1.23396	0.76604	0.46715	0.48662	0.44769	2.59854	0.73903	1.26097	1	0.78148	1.21852	1.21937	0.34188	2.17664	0.26211	1.38279	0.61721	1.38028	0.61972	0.36782	0.96552	0.16092	2.50575	0.43049	1.56951	1.13761
	Decacovirus	Rousettus_bat_coronavirus_HKU10-183A_JQ989270	2.13243	0.21732	0.57046	1.0798	1.56066	0.43934	1.24066	0.75934	0.71088	1.28912	1.5706	0.4294	2.92386	0.08122	0.64298	0.35195	0.64407	1.35593	1.89716	0.76805	0.33479	1.22097	0.77903	0.45854	0.46829	0.49756	2.57561	0.75926	1.24074	1	0.76866	1.23134	1.25356	0.36467	2.15385	0.22792	1.39053	0.60947	1.3662	0.6338	0.3908	0.96552	0.16092	2.48276	0.43439	1.56561	1.10158
	Decacovirus	Rousettus_bat_coronavirus_HKU10-183A_NC_018871	2.13243	0.21732	0.57046	1.0798	1.56066	0.43934	1.24066	0.75934	0.71088	1.28912	1.56977	0.43023	2.92386	0.08122	0.64298	0.35195	0.64407	1.35593	1.89716	0.76805	0.33479	1.21951	0.78049	0.45854	0.46829	0.49756	2.57561	0.76212	1.23788	1	0.77095	1.22905	1.25356	0.36467	2.15385	0.22792	1.39053	0.60947	1.3662	0.6338	0.3908	0.96552	0.16092	2.48276	0.43439	1.56561	1.10158
	Hibecovirus	Bat_Hp-betacoronavirus_Zhejiang2013_NC_025217	1.84189	0.29958	0.61581	1.24272	1.38728	0.61272	1.08059	0.91941	0.66512	1.33488	1.248	0.752	1.94346	0.26855	0.85512	0.93286	0.80184	1.19816	1.54438	0.76331	0.69231	1.15	0.85	0.67784	0.80447	0.75233	1.76536	0.79495	1.20505	1	0.79137	1.20863	1.48598	0.47664	1.76636	0.27103	1.3027	0.6973	1.5375	0.4625	0.48372	1.15349	0.26047	2.10233	0.66667	1.33333	1.45872
	Hibecovirus	Bat_Hp-betacoronavirus_Zhejiang2013_KF636752	1.84189	0.29958	0.61581	1.24272	1.38728	0.61272	1.08059	0.91941	0.66512	1.33488	1.248	0.752	1.94346	0.26855	0.85512	0.93286	0.80184	1.19816	1.54438	0.76331	0.69231	1.15	0.85	0.67784	0.80447	0.75233	1.76536	0.79495	1.20505	1	0.79137	1.20863	1.48598	0.47664	1.76636	0.27103	1.3027	0.6973	1.5375	0.4625	0.48372	1.15349	0.26047	2.10233	0.66667	1.33333	1.45872
	Merbecovirus	BtVs-BetaCoV_SC2013_UNKNOWN-KJ473821_KJ473821	1.92982	0.29574	0.71178	1.06266	1.25478	0.74522	1.28015	0.71985	1.15288	0.84712	1.33467	0.66533	2.07383	0.38255	1.02013	0.52349	0.71154	1.28846	1.62	0.78667	0.59333	0.74672	1.25328	0.53425	0.82192	0.79452	1.84932	0.77654	1.22346	1	0.7301	1.2699	1.0393	0.55895	2.03493	0.36681	0.92228	1.07772	1.03268	0.96732	0.40506	1.08017	0.42194	2.09283	0.66364	1.33636	0.91829
	Merbecovirus	Bat-CoV_H_savii_Italy_206645-40_2011_MG596802	2.0791	0.23729	0.51977	1.16384	1.43234	0.56766	1.38491	0.61509	0.80201	1.19799	1.48031	0.51969	2.36491	0.21053	0.77193	0.65263	0.48039	1.51961	1.55556	1.03086	0.41358	1.02448	0.97552	0.67521	0.69231	0.5641	2.06838	1.04842	0.95158	1	0.5293	1.4707	1.19904	0.58513	1.9952	0.22062	1.18252	0.81748	1.30323	0.69677	0.44651	0.8186	0.22326	2.51163	0.51181	1.48819	1.33835
	Merbecovirus	Bat-CoV_P_khulii_Italy_206645-63_2011_MG596803	2.06197	0.23099	0.52958	1.17746	1.45695	0.54305	1.39382	0.60618	0.78195	1.21805	1.5	0.5	2.37324	0.21831	0.74648	0.66197	0.47805	1.52195	1.54303	1.0082	0.44877	1.03189	0.96811	0.68085	0.68936	0.5617	2.06809	1.05708	0.94292	1	0.54023	1.45977	1.21241	0.5537	2.00477	0.22912	1.17949	0.82051	1.30323	0.69677	0.42791	0.8	0.24186	2.53023	0.53282	1.46718	1.35863
	Merbecovirus	MERS-related_Neoromicia_5038_MF593268	2.11895	0.27109	0.55878	1.05118	1.40594	0.59406	1.34489	0.65511	0.88725	1.11275	1.51004	0.48996	2.25763	0.23729	0.88814	0.61695	0.60784	1.39216	1.64072	0.87425	0.48503	0.99234	1.00766	0.58667	0.73143	0.59429	2.08762	0.95864	1.04136	1	0.63039	1.36961	1.0254	0.64665	2.14319	0.18476	1.05205	0.94795	1.33333	0.66667	0.43668	0.9607	0.29694	2.30568	0.53571	1.46429	1.18406
	Merbecovirus	Pipistrellus_abramus_bat_coronavirus_HKU5-related-BY140568_MN611520	1.74359	0.35088	0.71255	1.19298	1.1634	0.8366	1.22787	0.77213	0.86284	1.13716	1.09317	0.90683	1.85616	0.26712	1.05479	0.82192	0.69524	1.30476	1.46526	0.70105	0.83368	0.93411	1.06589	0.6859	0.92308	0.73718	1.65385	0.90071	1.09929	1	0.72932	1.27068	1.19722	0.65893	1.87471	0.26914	1.02841	0.97159	1.28395	0.71605	0.52542	1.11864	0.45763	1.89831	0.68936	1.31064	1.17602
	Merbecovirus	Tylonycteris_pachypus_bat_coronavirus_HKU4-related-GZ131656_MN611519	2.09091	0.27841	0.47159	1.15909	1.60656	0.39344	1.45856	0.54144	0.75862	1.24138	1.55691	0.44309	2.50927	0.26981	0.72175	0.49916	0.4264	1.5736	1.68145	0.91935	0.39919	1.14447	0.85553	0.69725	0.6422	0.43119	2.22936	1.1798	0.8202	1	0.47292	1.52708	1.17647	0.32353	2.34314	0.15686	1.17722	0.82278	1.36552	0.63448	0.43836	0.91324	0.3105	2.3379	0.45059	1.54941	1.30924
	Merbecovirus	Neoromicia_PML-PHE1_RSA_2011_KC869678	2.10585	0.28412	0.5571	1.05292	1.375	0.625	1.32438	0.67562	0.92804	1.07196	1.52191	0.47809	2.24788	0.23769	0.87606	0.63837	0.5561	1.4439	1.6875	0.85887	0.45363	0.99614	1.00386	0.6019	0.71619	0.60952	2.07238	0.98272	1.01728	1	0.66034	1.33966	1.03432	0.60412	2.17849	0.18307	1.04065	0.95935	1.32895	0.67105	0.40889	0.94222	0.37333	2.27556	0.53333	1.46667	1.16008
	Merbecovirus	Bat_coronavirus_HKU5-1-LMH03f_EF065509	1.7429	0.33018	0.73072	1.19621	1.21173	0.78827	1.22642	0.77358	0.855	1.145	1.05833	0.94167	1.87307	0.25386	1.0223	0.85077	0.7177	1.2823	1.40385	0.72436	0.87179	0.93642	1.06358	0.5798	0.85993	0.7557	1.80456	0.95105	1.04895	1	0.742	1.258	1.2529	0.69606	1.75406	0.29698	1.08475	0.91525	1.25786	0.74214	0.44053	1.18062	0.44053	1.93833	0.70386	1.29614	1.21705
	Merbecovirus	BtPABetaCoV_GD2013-BtPAGD2013_KJ473820	1.72349	0.33826	0.73557	1.20268	1.23127	0.76873	1.22264	0.77736	0.835	1.165	1.12863	0.87137	1.85886	0.28227	1.04647	0.81239	0.77228	1.22772	1.46835	0.72152	0.81013	0.92925	1.07075	0.68182	0.85065	0.74675	1.72078	0.93007	1.06993	1	0.73645	1.26355	1.24201	0.65753	1.80822	0.29224	1.03977	0.96023	1.25974	0.74026	0.5812	1.1453	0.37607	1.89744	0.70386	1.29614	1.13503
	Merbecovirus	Pipistrellus_bat_coronavirus_HKU5-1_LMH03f_NC_009020	1.72959	0.33199	0.72825	1.21017	1.21173	0.78827	1.22015	0.77985	0.84466	1.15534	1.06029	0.93971	1.86847	0.25632	1.01855	0.85666	0.73148	1.26852	1.40211	0.72632	0.87158	0.94275	1.05725	0.60248	0.86335	0.78882	1.74534	0.95205	1.04795	1	0.74436	1.25564	1.27354	0.72646	1.713	0.287	1.08197	0.91803	1.23171	0.76829	0.44828	1.18966	0.46552	1.89655	0.725	1.275	1.22034
	Merbecovirus	Bat_coronavirus_HKU4-1_B04f_EF065505	2.08947	0.22511	0.51371	1.17172	1.60526	0.39474	1.47698	0.52302	0.74667	1.25333	1.59839	0.40161	2.53242	0.25939	0.68259	0.5256	0.44103	1.55897	1.60606	0.93939	0.45455	1.11488	0.88512	0.62911	0.60094	0.46009	2.30986	1.14115	0.85885	1	0.47464	1.52536	1.20588	0.32353	2.31373	0.15686	1.20382	0.79618	1.34722	0.65278	0.47059	0.85068	0.27149	2.40724	0.45136	1.54864	1.296
	Merbecovirus	BtTp-BetaCoV_GX2012_BtTp-GX2012_KJ473822	2.14509	0.19915	0.43243	1.22333	1.54693	0.45307	1.48794	0.51206	0.73879	1.26121	1.57746	0.42254	2.49746	0.26396	0.67005	0.56853	0.47475	1.52525	1.6168	0.95902	0.42418	1.09811	0.90189	0.55746	0.5868	0.38142	2.47433	1.13786	0.86214	1	0.46655	1.53345	1.21696	0.33915	2.30424	0.13965	1.16294	0.83706	1.27778	0.72222	0.56364	0.83636	0.23636	2.36364	0.47843	1.52157	1.27968
	Merbecovirus	Tylonycteris_bat_coronavirus_HKU4_HKU4-1_B04f_NC_009019	2.0745	0.22923	0.51576	1.18052	1.60526	0.39474	1.46474	0.53526	0.75521	1.24479	1.59761	0.40239	2.49082	0.26711	0.68114	0.56093	0.45226	1.54774	1.596	0.942	0.462	1.11152	0.88848	0.65789	0.62281	0.50877	2.21053	1.13725	0.86275	1	0.47842	1.52158	1.23585	0.33962	2.26415	0.16038	1.17791	0.82209	1.32432	0.67568	0.46637	0.87892	0.26906	2.38565	0.47727	1.52273	1.29183
	Merbecovirus	Tylonycteris_bat_coronavirus_HKU4_SM3A_MW218395	2.11833	0.21356	0.48485	1.18326	1.60396	0.39604	1.49265	0.50735	0.75332	1.24668	1.58233	0.41767	2.53061	0.26531	0.68027	0.52381	0.43878	1.56122	1.614	0.942	0.444	1.10566	0.89434	0.63551	0.58879	0.4486	2.3271	1.1332	0.8668	1	0.47826	1.52174	1.21481	0.32593	2.33086	0.1284	1.21656	0.78344	1.34722	0.65278	0.47273	0.83636	0.27273	2.41818	0.46923	1.53077	1.31746
	Merbecovirus	Hypsugo_bat_coronavirus_HKU25_NL140462_KX442565	1.83467	0.30933	0.65067	1.20533	1.21136	0.78864	1.25651	0.74349	0.90585	1.09415	1.17043	0.82957	2.01033	0.19966	0.99828	0.79174	0.7109	1.2891	1.4449	0.72857	0.82653	0.98279	1.01721	0.58065	0.98925	0.61649	1.81362	0.96254	1.03746	1	0.75926	1.24074	1.21818	0.50909	2.06364	0.20909	1.02933	0.97067	1.16667	0.83333	0.48869	1.04977	0.43439	2.02715	0.65403	1.34597	1.19021
	Merbecovirus	Hypsugo_bat_coronavirus_HKU25_YD131305_KX442564	1.92513	0.32086	0.62032	1.13369	1.19108	0.80892	1.31099	0.68901	0.92857	1.07143	1.14286	0.85714	2.0411	0.21918	0.93836	0.80137	0.70755	1.29245	1.5	0.77143	0.72857	1.02119	0.97881	0.59259	0.9806	0.62787	1.79894	0.96491	1.03509	1	0.73704	1.26296	1.15068	0.54795	2.11872	0.18265	1	1	1.24675	0.75325	0.42478	1.06195	0.47788	2.0354	0.63014	1.36986	1.24764
	Merbecovirus	Bat_coronavirus_JPDB144_KU182965	2.08357	0.22841	0.50696	1.18106	1.54839	0.45161	1.52747	0.47253	0.69816	1.30184	1.56574	0.43426	2.52381	0.27211	0.63265	0.57143	0.46	1.54	1.63747	0.97149	0.39104	1.07692	0.92308	0.69811	0.61321	0.45283	2.23585	1.13828	0.86172	1	0.48087	1.51913	1.14568	0.39506	2.25185	0.20741	1.21384	0.78616	1.27273	0.72727	0.45045	0.82883	0.30631	2.41441	0.48387	1.51613	1.34141
	Merbecovirus	Bat_coronavirus_PREDICT_PDF-2180_KX574227	1.93768	0.26062	0.69688	1.10482	1.32013	0.67987	1.33725	0.66275	0.90957	1.09043	1.37832	0.62168	2.28076	0.2357	0.90121	0.58232	0.60825	1.39175	1.7395	0.79412	0.46639	0.93227	1.06773	0.52107	0.8046	0.59004	2.08429	0.96296	1.03704	1	0.607	1.393	0.95775	0.74178	2.12207	0.1784	0.97421	1.02579	1.24476	0.75524	0.37333	1.12	0.32	2.18667	0.553	1.447	1.10687
	Merbecovirus	Bat_coronavirus_PREDICT_PDF-2180_NC_034440	1.9353	0.25879	0.69761	1.1083	1.32026	0.67974	1.33592	0.66408	0.90476	1.09524	1.38337	0.61663	2.28571	0.23408	0.89501	0.5852	0.59898	1.40102	1.73486	0.79541	0.46973	0.92702	1.07298	0.52107	0.8046	0.59004	2.08429	0.96588	1.03412	1	0.60735	1.39265	0.9555	0.74941	2.1171	0.17799	0.97714	1.02286	1.23288	0.76712	0.38938	1.11504	0.31858	2.17699	0.55046	1.44954	1.10266
	Merbecovirus	Bat_coronavirus_Vs-CoV-1_LC469308	1.90206	0.31443	0.74227	1.04124	1.24204	0.75796	1.2803	0.7197	1.12435	0.87565	1.33333	0.66667	2.14853	0.36615	0.981	0.50432	0.64455	1.35545	1.61798	0.80899	0.57303	0.72692	1.27308	0.47273	0.81455	0.76364	1.94909	0.8169	1.1831	1	0.7319	1.2681	1.06488	0.52796	2.04922	0.35794	0.94652	1.05348	1.14839	0.85161	0.39827	1.12554	0.4329	2.04329	0.64762	1.35238	0.95534
	Minunacovirus	Miniopterus_pusillus_bat_coronavirus_HKU8-related_6610_MN611518	1.97701	0.31609	0.79885	0.90805	1.39432	0.60568	1.40434	0.59566	1.06383	0.93617	1.52347	0.47653	2.58385	0.13043	1.03106	0.25466	0.64634	1.35366	1.87234	0.49645	0.63121	0.74134	1.25866	0.2603	0.64208	0.53796	2.55965	0.45367	1.54633	1	0.57418	1.42582	1.24538	0.40106	2.08971	0.26385	0.71942	1.28058	0.93617	1.06383	0.28916	1.01205	0.16064	2.53815	0.52093	1.47907	0.98667
	Minunacovirus	Miniopterus_schreibersii_bat_coronavirus_1-related_161454_MN611524	2.33496	0.14959	0.4813	1.03415	1.44516	0.55484	1.25545	0.74455	0.65789	1.34211	1.41264	0.58736	2.63069	0.06071	0.78246	0.52614	0.42604	1.57396	1.91633	0.61224	0.47143	1.11954	0.88046	0.5	0.4375	0.45536	2.60714	0.75926	1.24074	1	0.60513	1.39487	1.18885	0.17337	2.5387	0.09907	1.12062	0.87938	1.62903	0.37097	0.26667	1	0.15556	2.57778	0.42975	1.57025	1.15193
	Minunacovirus	BtMf-AlphaCoV_AH2011_KJ473795	2.40924	0.09901	0.43564	1.05611	1.50162	0.49838	1.27273	0.72727	0.65274	1.34726	1.43879	0.56121	2.66667	0.08	0.75333	0.5	0.48235	1.51765	1.8833	0.60966	0.50704	1.10397	0.89603	0.48624	0.42202	0.45872	2.63303	0.8012	1.1988	1	0.57922	1.42078	1.20245	0.25767	2.44172	0.09816	1.12253	0.87747	1.6	0.4	0.28571	1.01099	0.10989	2.59341	0.45267	1.54733	1.14416
	Minunacovirus	BtMf-AlphaCoV_JX2012_KJ473796	2.36453	0.12479	0.51232	0.99836	1.45631	0.54369	1.30315	0.69685	0.62992	1.37008	1.42644	0.57356	2.74247	0.06689	0.6689	0.52174	0.47953	1.52047	1.84105	0.58551	0.57344	1.0819	0.9181	0.49428	0.4119	0.46682	2.627	0.7678	1.2322	1	0.59107	1.40893	1.17647	0.19814	2.52632	0.09907	1.14063	0.85938	1.536	0.464	0.19672	1.04918	0.19672	2.55738	0.39516	1.60484	1.11061
	Minunacovirus	BtMf-FJ2012_KJ473799	2.05233	0.22093	0.79651	0.93023	1.4	0.6	1.36078	0.63922	1.13441	0.86559	1.47905	0.52095	2.61562	0.10413	1.00459	0.27565	0.72619	1.27381	1.85211	0.56338	0.58451	0.81764	1.18236	0.30707	0.67879	0.54949	2.46465	0.41745	1.58255	1	0.61832	1.38168	1.15344	0.48677	2.08466	0.27513	0.76534	1.23466	0.90598	1.09402	0.31799	0.90377	0.16736	2.61088	0.57658	1.42342	0.9148
	Minunacovirus	BtMf-GD2012_KJ473797	2	0.33429	0.76081	0.9049	1.40127	0.59873	1.43418	0.56582	1.08108	0.91892	1.53091	0.46909	2.56347	0.11765	1.06502	0.25387	0.68208	1.31792	1.94159	0.49766	0.56075	0.74694	1.25306	0.28926	0.57025	0.56198	2.57851	0.47771	1.52229	1	0.60952	1.39048	1.19481	0.46753	2.0987	0.23896	0.70213	1.29787	0.93333	1.06667	0.27419	0.96774	0.17742	2.58065	0.51163	1.48837	0.96916
	Minunacovirus	BtMf-HeN2013_KJ473800	2.07514	0.23121	0.75723	0.93642	1.41325	0.58675	1.34241	0.65759	1.1694	0.8306	1.50909	0.49091	2.57231	0.11077	1.03385	0.28308	0.71765	1.28235	1.89882	0.57882	0.52235	0.81288	1.18712	0.34538	0.72289	0.52209	2.40964	0.42368	1.57632	1	0.62188	1.37812	1.10933	0.50133	2.08	0.30933	0.75714	1.24286	0.88333	1.11667	0.33195	0.91286	0.19917	2.55602	0.54545	1.45455	0.89189
	Minunacovirus	BtMf-HuB2013_KJ473798	2.07101	0.20118	0.78698	0.94083	1.40994	0.59006	1.34132	0.65868	1.14362	0.85638	1.53761	0.46239	2.58679	0.14132	0.99539	0.2765	0.72941	1.27059	1.86041	0.56293	0.57666	0.78471	1.21529	0.28	0.576	0.56	2.584	0.41231	1.58769	1	0.60274	1.39726	1.19149	0.52128	2.01064	0.2766	0.71685	1.28315	0.94017	1.05983	0.35146	0.95397	0.11715	2.57741	0.58447	1.41553	0.92727
	Myotacovirus	BtMr-AlphaCoV_SAX2011_KJ473806	1.90361	0.24096	0.55422	1.3012	1.46965	0.53035	1.17485	0.82515	1.01796	0.98204	1.54032	0.45968	2.63087	0.12081	0.87919	0.36913	0.64671	1.35329	1.72727	0.81818	0.45455	0.88889	1.11111	0.51613	0.52473	0.74839	2.21075	0.68519	1.31481	1	0.6771	1.3229	1.51084	0.50774	1.73375	0.24768	0.93818	1.06182	1.37705	0.62295	0.19802	1.16832	0.19802	2.43564	0.60729	1.39271	1.27704
	Myotacovirus	BtMr-AlphaCoV_SAX2011_NC_028811	1.90361	0.24096	0.55422	1.3012	1.46965	0.53035	1.17485	0.82515	1.01796	0.98204	1.54032	0.45968	2.63087	0.12081	0.87919	0.36913	0.64671	1.35329	1.72727	0.81818	0.45455	0.88889	1.11111	0.51613	0.52473	0.74839	2.21075	0.68519	1.31481	1	0.6771	1.3229	1.51084	0.50774	1.73375	0.24768	0.93818	1.06182	1.37705	0.62295	0.19802	1.16832	0.19802	2.43564	0.60729	1.39271	1.27704
	Myotacovirus	Bat_coronavirus_Anlong-57_KY770851	1.82769	0.22769	0.76308	1.18154	1.41935	0.58065	1.15275	0.84725	0.98599	1.01401	1.44583	0.55417	2.61929	0.16244	0.84602	0.37225	0.72727	1.27273	1.60194	0.92476	0.4733	0.84211	1.15789	0.42702	0.66231	0.7756	2.13508	0.51724	1.48276	1	0.70928	1.29072	1.52615	0.46769	1.69846	0.30769	0.76015	1.23985	1.19626	0.80374	0.22535	1.0892	0.28169	2.40376	0.46825	1.53175	1.19452
	Nobecovirus	BtRt-BetaCoV_GX2018_MK211379	1.96865	0.23197	0.48276	1.31661	1.65568	0.34432	1.45	0.55	0.63664	1.36336	1.67647	0.32353	2.69314	0.20217	0.55596	0.54874	0.49697	1.50303	1.57463	1.13433	0.29104	1.21868	0.78132	0.8596	0.55014	0.52722	2.06304	1.08627	0.91373	1	0.47465	1.52535	1.13744	0.35071	2.23697	0.27488	1.26599	0.73401	1.36667	0.63333	0.42202	0.62385	0.22018	2.73394	0.33333	1.66667	1.2
	Nobecovirus	Rousettus_bat_coronavirus-GCCDC1_356_NC_030886	1.74005	0.46154	0.72679	1.07162	1.14734	0.85266	1.05433	0.94567	1.08654	0.91346	1.45205	0.54795	1.87928	0.32626	1.17455	0.6199	0.71795	1.28205	1.36364	1.10565	0.53071	0.86902	1.13098	0.86713	0.67133	1.12587	1.33566	0.7619	1.2381	1	1.01062	0.98938	1.37748	0.58278	1.49227	0.54746	0.89676	1.10324	0.98387	1.01613	0.27143	1.47143	0.5	1.75714	0.86992	1.13008	1.05714
	Nobecovirus	Bat_coronavirus_HKU9-1_EF065513	1.85393	0.52809	0.58989	1.02809	1.46	0.54	1.40741	0.59259	1.0088	0.9912	1.64545	0.35455	2.68204	0.28995	0.73147	0.29654	0.46667	1.53333	1.52482	1.1773	0.29787	0.78886	1.21114	0.81865	0.56995	0.7772	1.8342	0.93939	1.06061	1	0.43354	1.56646	1.04308	0.47166	2.04989	0.43537	0.88079	1.11921	0.98113	1.01887	0.23346	0.88716	0.26459	2.61479	0.392	1.608	1.03883
	Nobecovirus	Bat_coronavirus_HKU9-10-1_HM211100	1.70732	0.60163	0.69919	0.99187	1.41781	0.58219	1.31881	0.68119	1.05949	0.94051	1.60305	0.39695	2.36394	0.3005	0.9616	0.37396	0.60227	1.39773	1.33419	1.41131	0.2545	0.71462	1.28538	0.9927	0.48662	0.6618	1.85888	0.91182	1.08818	1	0.56723	1.43277	1.10158	0.42438	1.97743	0.49661	0.8141	1.1859	1.00654	0.99346	0.25092	1.10701	0.56089	2.08118	0.40816	1.59184	1.13
	Nobecovirus	Bat_coronavirus_HKU9-10-2_HM211101	1.8331	0.37341	0.65064	1.14286	1.46801	0.53199	1.38431	0.61569	1.09145	0.90855	1.69626	0.30374	2.43189	0.30565	0.89037	0.37209	0.43678	1.56322	1.51493	1.23134	0.25373	0.81002	1.18998	0.91713	0.39779	0.77348	1.9116	0.91756	1.08244	1	0.52941	1.47059	1.15576	0.55982	1.90519	0.37923	0.85981	1.14019	1.12308	0.87692	0.32653	1.0449	0.35918	2.26939	0.42353	1.57647	1.09273
	Nobecovirus	Bat_coronavirus_HKU9-5-1_HM211098	1.70889	0.60916	0.70081	0.98113	1.41096	0.58904	1.33201	0.66799	1.0565	0.9435	1.61421	0.38579	2.36273	0.29285	0.9584	0.38602	0.59551	1.40449	1.31877	1.41902	0.26221	0.7239	1.2761	1.00246	0.48157	0.6683	1.84767	0.91215	1.08785	1	0.56604	1.43396	1.09255	0.42438	1.9684	0.51467	0.8115	1.1885	0.99338	1.00662	0.25373	1.13433	0.55224	2.0597	0.40984	1.59016	1.12
	Nobecovirus	Bat_coronavirus_HKU9-5-2_HM211099	1.80226	0.40113	0.66667	1.12994	1.4702	0.5298	1.40198	0.59802	1.04571	0.95429	1.70233	0.29767	2.44335	0.32184	0.8867	0.34811	0.45714	1.54286	1.49624	1.20301	0.30075	0.81159	1.18841	0.9	0.45556	0.73333	1.91111	0.93333	1.06667	1	0.51899	1.48101	1.17381	0.59594	1.79684	0.43341	0.83333	1.16667	1.152	0.848	0.2915	1.1336	0.32389	2.25101	0.4	1.6	1.09453
	Nobecovirus	Rousettus_bat_coronavirus_HKU9_HKU9-1_BF_005I_NC_009021	1.85393	0.52809	0.58989	1.02809	1.46	0.54	1.40741	0.59259	1.0088	0.9912	1.64545	0.35455	2.68204	0.28995	0.73147	0.29654	0.46667	1.53333	1.52482	1.1773	0.29787	0.78886	1.21114	0.81865	0.56995	0.7772	1.8342	0.93939	1.06061	1	0.43354	1.56646	1.04308	0.47166	2.04989	0.43537	0.88079	1.11921	0.98113	1.01887	0.23346	0.88716	0.26459	2.61479	0.392	1.608	1.03883
	Nobecovirus	Rousettus_spp_Jinghong_2009_MG762674	1.86742	0.46827	0.67137	0.99295	1.53177	0.46823	1.30677	0.69323	1.0303	0.9697	1.58654	0.41346	2.56529	0.23802	0.79339	0.40331	0.47514	1.52486	1.48485	1.27273	0.24242	0.89625	1.10375	0.86099	0.50224	0.86099	1.77578	0.87866	1.12134	1	0.56838	1.43162	1.14159	0.63717	1.80531	0.41593	0.97076	1.02924	1.12	0.88	0.22047	0.86614	0.50394	2.40945	0.41525	1.58475	1.04854
	Nobecovirus	Rousettus_bat_coronavirus_GCCDC1_356_KU762338	1.74005	0.46154	0.72679	1.07162	1.14734	0.85266	1.05433	0.94567	1.08654	0.91346	1.45205	0.54795	1.87928	0.32626	1.17455	0.6199	0.71795	1.28205	1.36364	1.10565	0.53071	0.86902	1.13098	0.86713	0.67133	1.12587	1.33566	0.7619	1.2381	1	1.01062	0.98938	1.37748	0.58278	1.49227	0.54746	0.89676	1.10324	0.98387	1.01613	0.27143	1.47143	0.5	1.75714	0.86992	1.13008	1.05714
	Nobecovirus	Bat_coronavirus_BtCoV92_MK492263	1.93703	0.21589	0.53973	1.30735	1.61745	0.38255	1.3501	0.6499	0.59299	1.40701	1.62557	0.37443	2.73005	0.21053	0.54329	0.51613	0.50286	1.49714	1.5	1.13182	0.36818	1.17339	0.82661	0.85981	0.50467	0.60748	2.02804	1.17358	0.82642	1	0.5283	1.4717	1.28319	0.31858	2.15929	0.23894	1.25857	0.74143	1.4507	0.5493	0.43515	0.85356	0.13389	2.57741	0.40175	1.59825	1.05747
	Nyctacovirus	BaTCoV_P_kuhlii_Italy_206645-41_2011_MH938448	2.0032	0.2112	0.8128	0.9728	1.34426	0.65574	1.09939	0.90061	0.89535	1.10465	1.39535	0.60465	2.38944	0.19802	1.0033	0.40924	0.61446	1.38554	1.78079	0.4064	0.81281	0.75922	1.24078	0.24015	0.70544	0.55535	2.49906	0.43548	1.56452	1	0.71032	1.28968	1.19637	0.49547	2.07855	0.22961	0.82437	1.17563	1.14286	0.85714	0.48945	0.86076	0.23629	2.4135	0.57005	1.42995	1.27231
	Nyctacovirus	BaTCoV_P_kuhlii_Italy_206679-3_2010_MH938450	2.22648	0.19139	0.64434	0.9378	1.57491	0.42509	1.21951	0.78049	0.87316	1.12684	1.5434	0.4566	2.60841	0.18123	0.73139	0.47896	0.71856	1.28144	1.85151	0.55684	0.59165	1.01022	0.98978	0.37416	0.49889	0.48107	2.64588	0.62951	1.37049	1	0.73783	1.26217	1.22523	0.36036	2.23423	0.18018	1.15217	0.84783	1.21368	0.78632	0.16822	0.80374	0.28037	2.74766	0.46445	1.53555	1.24878
	Nyctacovirus	BaTCoV_P_kuhlii_Italy_3398-19_2015_MH938449	2.16114	0.24013	0.65087	0.94787	1.58741	0.41259	1.23673	0.76327	0.84615	1.15385	1.569	0.431	2.62969	0.16966	0.67863	0.52202	0.62651	1.37349	1.86429	0.52857	0.60714	1	1	0.40798	0.56763	0.4612	2.56319	0.53821	1.46179	1	0.75836	1.24164	1.22054	0.3142	2.25982	0.20544	1.11765	0.88235	1.20354	0.79646	0.21918	0.74886	0.29224	2.73973	0.42857	1.57143	1.23902
	Nyctacovirus	BaTCoV_P_kuhlii_Italy_3398-19_2015_NC_046964	2.16114	0.24013	0.65087	0.94787	1.58741	0.41259	1.23673	0.76327	0.84615	1.15385	1.569	0.431	2.62969	0.16966	0.67863	0.52202	0.62651	1.37349	1.86429	0.52857	0.60714	1	1	0.40798	0.56763	0.4612	2.56319	0.53821	1.46179	1	0.75836	1.24164	1.22054	0.3142	2.25982	0.20544	1.11765	0.88235	1.20354	0.79646	0.21918	0.74886	0.29224	2.73973	0.42857	1.57143	1.23902
	Nyctacovirus	BtNv-AlphaCoV_SC2013_KJ473809	2.02685	0.26174	0.65101	1.0604	1.50327	0.49673	1.15789	0.84211	1.09816	0.90184	1.59841	0.40159	2.62932	0.19769	0.87644	0.29654	0.78161	1.21839	1.73924	0.68354	0.57722	0.819	1.181	0.46043	0.52758	0.70983	2.30216	0.54848	1.45152	1	0.74847	1.25153	1.05263	0.50774	2.06811	0.37152	0.95094	1.04906	1.10204	0.89796	0.26337	1.03704	0.31276	2.38683	0.43966	1.56034	1.12649
	Nyctacovirus	BtNv-AlphaCoV_SC2013_NC_028833	2.02685	0.26174	0.65101	1.0604	1.50327	0.49673	1.15789	0.84211	1.09816	0.90184	1.59841	0.40159	2.62932	0.19769	0.87644	0.29654	0.78161	1.21839	1.73924	0.68354	0.57722	0.819	1.181	0.46043	0.52758	0.70983	2.30216	0.54848	1.45152	1	0.74847	1.25153	1.05263	0.50774	2.06811	0.37152	0.95094	1.04906	1.10204	0.89796	0.26337	1.03704	0.31276	2.38683	0.43966	1.56034	1.12649
	Nyctacovirus	Tylonycteris_bat_coronavirus_HKU33_GZ151867_MK720944	2.41455	0.16727	0.50909	0.90909	1.67442	0.32558	1.41897	0.58103	0.65031	1.34969	1.67985	0.32015	2.90592	0.08362	0.5784	0.43206	0.36129	1.63871	1.71136	0.88636	0.40227	1.11294	0.88706	0.5	0.45833	0.32292	2.71875	0.8744	1.1256	1	0.45574	1.54426	1.31707	0.2561	2.31707	0.10976	1.21324	0.78676	1.36207	0.63793	0.29268	0.50732	0.13659	3.06341	0.40496	1.59504	1.15904
	Pedacovirus	AlphaCoV_16715_23_MH687934	1.97193	0.17544	0.68772	1.16491	1.49495	0.50505	1.27379	0.72621	0.82899	1.17101	1.50898	0.49102	2.70903	0.20067	0.68227	0.40803	0.80925	1.19075	1.65772	0.74497	0.59732	0.94653	1.05347	0.5037	0.64198	0.73086	2.12346	0.58879	1.41121	1	0.7028	1.2972	1.32537	0.48955	1.97015	0.21493	1.10345	0.89655	1.29167	0.70833	0.54348	0.71739	0.28261	2.45652	0.41441	1.58559	1.31818
	Pedacovirus	AlphaCoV_16715_24_MH687935	1.96161	0.27225	0.67714	1.08901	1.44781	0.55219	1.15851	0.84149	0.78824	1.21176	1.52268	0.47732	2.70432	0.15947	0.75748	0.37874	0.68208	1.31792	1.68571	0.8	0.51429	1.0096	0.9904	0.54726	0.53731	0.71642	2.199	0.60488	1.39512	1	0.76894	1.23106	1.36	0.61714	1.58857	0.43429	1.09541	0.90459	1.15436	0.84564	0.42781	0.79144	0.29947	2.48128	0.42152	1.57848	1.25176
	Pedacovirus	AlphaCoV_16715_31_MH687936	1.89913	0.2713	0.73043	1.09913	1.40067	0.59933	1.14229	0.85771	0.77647	1.22353	1.50394	0.49606	2.70181	0.20428	0.73147	0.36244	0.67836	1.32164	1.68618	0.81499	0.49883	1.02317	0.97683	0.59148	0.53133	0.73183	2.14536	0.56863	1.43137	1	0.70321	1.29679	1.25714	0.62857	1.66857	0.44571	1.07746	0.92254	1.13548	0.86452	0.36757	0.75676	0.32432	2.55135	0.41441	1.58559	1.25822
	Pedacovirus	AlphaCoV_16715_32_MH687937	1.96441	0.18505	0.7331	1.11744	1.5034	0.4966	1.21569	0.78431	0.82081	1.17919	1.53267	0.46733	2.67758	0.17021	0.68085	0.47136	0.74157	1.25843	1.73128	0.73348	0.53524	0.95792	1.04208	0.57798	0.66972	0.77064	1.98165	0.58313	1.41687	1	0.71103	1.28897	1.31378	0.48094	1.95894	0.24633	1.07639	0.92361	1.26471	0.73529	0.58101	0.84916	0.26816	2.30168	0.425	1.575	1.21659
	Pedacovirus	AlphaCoV_16715_39_c1_MH687938	1.93706	0.2028	0.67832	1.18182	1.48822	0.51178	1.2278	0.7722	0.81977	1.18023	1.48617	0.51383	2.72454	0.18698	0.66778	0.4207	0.80925	1.19075	1.70953	0.73171	0.55876	0.95842	1.04158	0.55502	0.65072	0.74641	2.04785	0.55904	1.44096	1	0.69943	1.30057	1.31343	0.48955	1.98209	0.21493	1.09722	0.90278	1.27778	0.72222	0.55615	0.83422	0.27807	2.33155	0.46222	1.53778	1.27816
	Pedacovirus	AlphaCoV_16715_39_c2_MH687939	1.92334	0.26481	0.72474	1.08711	1.40067	0.59933	1.14625	0.85375	0.77647	1.22353	1.50394	0.49606	2.70395	0.21053	0.73026	0.35526	0.69006	1.30994	1.68618	0.80796	0.50585	1.01741	0.98259	0.60302	0.53266	0.71357	2.15075	0.56724	1.43276	1	0.70321	1.29679	1.24571	0.62857	1.66857	0.45714	1.07746	0.92254	1.14839	0.85161	0.38919	0.75676	0.32432	2.52973	0.41629	1.58371	1.25822
	Pedacovirus	AlphaCoV_16715_45_MH687940	1.90175	0.25965	0.75789	1.0807	1.4094	0.5906	1.16371	0.83629	0.75439	1.24561	1.53057	0.46943	2.68852	0.24262	0.7541	0.31475	0.73563	1.26437	1.6969	0.78759	0.51551	1.03042	0.96958	0.50646	0.58915	0.69251	2.21189	0.60563	1.39437	1	0.74952	1.25048	1.33333	0.61538	1.69801	0.35328	1.1	0.9	1.19728	0.80272	0.43716	0.78689	0.30601	2.46995	0.42396	1.57604	1.28605
	Pedacovirus	AlphaCoV_16715_47_c1_MH687941	1.94087	0.17391	0.6887	1.19652	1.46801	0.53199	1.24031	0.75969	0.8105	1.1895	1.50099	0.49901	2.69783	0.17362	0.69449	0.43406	0.73988	1.26012	1.68707	0.73469	0.57823	0.94444	1.05556	0.49756	0.68293	0.72195	2.09756	0.56471	1.43529	1	0.70169	1.29831	1.2819	0.47478	1.99407	0.24926	1.08711	0.91289	1.28169	0.71831	0.53763	0.77419	0.30108	2.3871	0.40359	1.59641	1.28111
	Pedacovirus	AlphaCoV_16715_47_c2_MH687942	1.97557	0.17452	0.71204	1.13787	1.46667	0.53333	1.21012	0.78988	0.77966	1.22034	1.52079	0.47921	2.64943	0.21325	0.67205	0.46527	0.68156	1.31844	1.73753	0.72234	0.54013	0.96016	1.03984	0.59633	0.7156	0.72477	1.9633	0.6186	1.3814	1	0.74576	1.25424	1.43099	0.4507	1.87042	0.24789	1.06944	0.93056	1.22302	0.77698	0.54645	0.87432	0.39344	2.18579	0.42276	1.57724	1.24263
	Pedacovirus	AlphaCoV_16715_5_MH687943	1.96036	0.14414	0.74234	1.15315	1.47119	0.52881	1.25049	0.74951	0.7942	1.2058	1.55424	0.44576	2.6798	0.1642	0.70279	0.4532	0.71111	1.28889	1.68919	0.74324	0.56757	0.94632	1.05368	0.57666	0.64989	0.79634	1.97712	0.6165	1.3835	1	0.72275	1.27725	1.31778	0.4898	1.95918	0.23324	1.08571	0.91429	1.33824	0.66176	0.55556	0.73333	0.26667	2.44444	0.36515	1.63485	1.22654
	Pedacovirus	AlphaCoV_16715_53_MH687944	2.01418	0.15603	0.70922	1.12057	1.51701	0.48299	1.23735	0.76265	0.7942	1.2058	1.53082	0.46918	2.67317	0.18211	0.66992	0.4748	0.71676	1.28324	1.70089	0.73661	0.5625	0.93097	1.06903	0.57416	0.7177	0.69856	2.00957	0.6028	1.3972	1	0.71619	1.28381	1.27168	0.52023	1.96532	0.24277	1.10714	0.89286	1.28244	0.71756	0.55866	0.78212	0.37989	2.27933	0.38333	1.61667	1.19362
	Pedacovirus	AlphaCoV_16715_56_MH687945	1.92083	0.21343	0.71601	1.14974	1.46441	0.53559	1.2407	0.7593	0.80466	1.19534	1.48893	0.51107	2.64883	0.17391	0.7291	0.44816	0.78571	1.21429	1.72297	0.76351	0.51351	0.948	1.052	0.54028	0.62559	0.77725	2.05687	0.62053	1.37947	1	0.7191	1.2809	1.33728	0.4497	1.95266	0.26036	1.08532	0.91468	1.25676	0.74324	0.53476	0.70588	0.27807	2.48128	0.39648	1.60352	1.32093
	Pedacovirus	AlphaCoV_16715_61_MH687946	1.94764	0.17452	0.71204	1.16579	1.47973	0.52027	1.24855	0.75145	0.8046	1.1954	1.501	0.499	2.66003	0.1592	0.72968	0.45108	0.74118	1.25882	1.74718	0.74492	0.5079	0.95825	1.04175	0.52632	0.62201	0.74641	2.10526	0.62708	1.37292	1	0.7259	1.2741	1.2819	0.47478	1.9822	0.26113	1.08651	0.91349	1.26174	0.73826	0.53191	0.80851	0.25532	2.40426	0.42152	1.57848	1.29954
	Pedacovirus	AlphaCoV_16715_7_MH687948	1.96528	0.15972	0.70139	1.17361	1.46128	0.53872	1.24031	0.75969	0.81844	1.18156	1.50996	0.49004	2.70647	0.1791	0.68325	0.43118	0.74419	1.25581	1.70455	0.75	0.54545	0.9503	1.0497	0.49878	0.61614	0.72372	2.16137	0.59294	1.40706	1	0.69811	1.30189	1.25816	0.52226	1.9822	0.23739	1.08966	0.91034	1.28276	0.71724	0.52174	0.73913	0.28261	2.45652	0.41629	1.58371	1.31481
	Pedacovirus	AlphaCoV_16715_76_MH687949	1.90576	0.30017	0.69808	1.09599	1.42088	0.57912	1.16601	0.83399	0.77059	1.22941	1.5225	0.4775	2.69536	0.17881	0.75497	0.37086	0.68605	1.31395	1.70309	0.81235	0.48456	1.01333	0.98667	0.53535	0.54545	0.71717	2.20202	0.63133	1.36867	1	0.75379	1.24621	1.36	0.59429	1.64571	0.4	1.0922	0.9078	1.16438	0.83562	0.45161	0.77419	0.27957	2.49462	0.42152	1.57848	1.26066
	Pedacovirus	AlphaCoV_16715_77_MH687950	1.90877	0.25965	0.76491	1.06667	1.41611	0.58389	1.18504	0.81496	0.77681	1.22319	1.50098	0.49902	2.74135	0.18451	0.73147	0.34267	0.69006	1.30994	1.65957	0.80142	0.53901	1.03263	0.96737	0.5614	0.5614	0.71178	2.16541	0.58596	1.41404	1	0.70857	1.29143	1.23782	0.60745	1.76504	0.38968	1.07473	0.92527	1.14103	0.85897	0.35359	0.83978	0.30939	2.49724	0.43519	1.56481	1.22791
	Pedacovirus	AlphaCoV_16715_78_MH687951	1.89065	0.26102	0.7478	1.10053	1.4094	0.5906	1.16535	0.83465	0.77778	1.22222	1.53057	0.46943	2.70627	0.23102	0.75248	0.31023	0.74713	1.25287	1.65714	0.79286	0.55	1.02476	0.97524	0.51546	0.57732	0.69072	2.21649	0.59906	1.40094	1	0.74472	1.25528	1.33333	0.64957	1.64103	0.37607	1.09677	0.90323	1.18919	0.81081	0.4153	0.80874	0.30601	2.46995	0.42009	1.57991	1.28337
	Pedacovirus	AlphaCoV_16715_84_MH687952	1.9823	0.24071	0.72212	1.05487	1.40268	0.59732	1.19124	0.80876	0.75371	1.24629	1.5	0.5	2.67758	0.24223	0.75286	0.32733	0.73446	1.26554	1.66587	0.8149	0.51923	1.02672	0.97328	0.52174	0.59335	0.70588	2.17903	0.57416	1.42584	1	0.74231	1.25769	1.30636	0.63584	1.6763	0.3815	1.0942	0.9058	1.18367	0.81633	0.43956	0.81319	0.32967	2.41758	0.44131	1.55869	1.26415
	Pedacovirus	AlphaCoV_16845_24_MH687954	1.9654	0.18685	0.70588	1.14187	1.46622	0.53378	1.26214	0.73786	0.77907	1.22093	1.51491	0.48509	2.66007	0.19802	0.71947	0.42244	0.76301	1.23699	1.71041	0.74661	0.54299	0.93517	1.06483	0.50363	0.68765	0.74576	2.06295	0.58095	1.41905	1	0.75614	1.24386	1.26686	0.52786	1.93548	0.26979	1.07692	0.92308	1.3007	0.6993	0.4973	0.73514	0.28108	2.48649	0.40909	1.59091	1.29274
	Pedacovirus	AlphaCoV_16845_47_MH687955	1.95398	0.16283	0.73628	1.1469	1.49153	0.50847	1.24125	0.75875	0.80466	1.19534	1.52964	0.47036	2.6623	0.17705	0.69508	0.46557	0.73988	1.26012	1.64602	0.75664	0.59735	0.94862	1.05138	0.60046	0.66513	0.75751	1.97691	0.60723	1.39277	1	0.71893	1.28107	1.27536	0.47536	2.0058	0.24348	1.08834	0.91166	1.31343	0.68657	0.56497	0.70056	0.27119	2.46328	0.39344	1.60656	1.2037
	Pedacovirus	AlphaCoV_16845_53_MH687956	1.94346	0.16961	0.73498	1.15194	1.47619	0.52381	1.22027	0.77973	0.79532	1.20468	1.548	0.452	2.63622	0.17618	0.70473	0.48287	0.73988	1.26012	1.70089	0.7567	0.54241	0.95238	1.04762	0.53271	0.6729	0.76636	2.02804	0.61575	1.38425	1	0.68966	1.31034	1.29446	0.4898	1.98251	0.23324	1.07692	0.92308	1.31818	0.68182	0.55866	0.75978	0.31285	2.36872	0.35391	1.64609	1.21101
	Pedacovirus	AlphaCoV_16845_64_MH687957	1.97531	0.1552	0.71958	1.14991	1.49488	0.50512	1.24706	0.75294	0.8046	1.1954	1.532	0.468	2.64052	0.18954	0.68627	0.48366	0.74286	1.25714	1.70379	0.73497	0.56125	0.93861	1.06139	0.61176	0.75294	0.70588	1.92941	0.60143	1.39857	1	0.7304	1.2696	1.27536	0.47536	1.98261	0.26667	1.06338	0.93662	1.28244	0.71756	0.54237	0.81356	0.36158	2.28249	0.39662	1.60338	1.22096
	Pedacovirus	AlphaCoV_16845_87_MH687958	1.96064	0.14311	0.75134	1.1449	1.50853	0.49147	1.2407	0.7593	0.81287	1.18713	1.5511	0.4489	2.6798	0.15764	0.68309	0.47947	0.76301	1.23699	1.72	0.72667	0.55333	0.95635	1.04365	0.55814	0.68837	0.76279	1.9907	0.59472	1.40528	1	0.72519	1.27481	1.31395	0.43023	2	0.25581	1.07266	0.92734	1.3037	0.6963	0.55866	0.73743	0.2905	2.41341	0.38211	1.61789	1.19266
	Pedacovirus	AlphaCoV_17819_17_MH687959	1.9375	0.26389	0.70139	1.09722	1.40067	0.59933	1.13439	0.86561	0.77876	1.22124	1.50884	0.49116	2.7084	0.20428	0.73147	0.35585	0.67836	1.32164	1.69718	0.8169	0.48592	1.02703	0.97297	0.58853	0.53865	0.73815	2.13466	0.56863	1.43137	1	0.69811	1.30189	1.24571	0.64	1.68	0.43429	1.07746	0.92254	1.13548	0.86452	0.3913	0.76087	0.30435	2.54348	0.41441	1.58559	1.2459
	Pedacovirus	AlphaCoV_17819_22_MH687960	1.89358	0.16147	0.77798	1.16697	1.48592	0.51408	1.2541	0.7459	0.81548	1.18452	1.54451	0.45549	2.64846	0.157	0.7099	0.48464	0.77381	1.22619	1.68192	0.73455	0.58352	0.95102	1.04898	0.5537	0.70644	0.78282	1.95704	0.62439	1.37561	1	0.71795	1.28205	1.28144	0.41916	2.05988	0.23952	1.04	0.96	1.32813	0.67188	0.57471	0.78161	0.27586	2.36782	0.38843	1.61157	1.20379
	Pedacovirus	AlphaCoV_17819_4_MH687961	1.97133	0.16487	0.74552	1.11828	1.51536	0.48464	1.21654	0.78346	0.82184	1.17816	1.53663	0.46337	2.66885	0.16393	0.68852	0.47869	0.72727	1.27273	1.7011	0.73187	0.56703	0.96	1.04	0.57798	0.68807	0.76147	1.97248	0.59809	1.40191	1	0.70455	1.29545	1.30994	0.45614	1.9883	0.24561	1.06944	0.93056	1.27407	0.72593	0.58101	0.82682	0.26816	2.32402	0.42324	1.57676	1.2194
	Pedacovirus	AlphaCoV_17819_50_MH687962	1.95745	0.25532	0.7234	1.06383	1.38832	0.61168	1.1746	0.8254	0.77745	1.22255	1.51012	0.48988	2.70489	0.19562	0.7285	0.37099	0.67052	1.32948	1.69286	0.80714	0.5	1.01163	0.98837	0.5422	0.53197	0.76726	2.15857	0.60513	1.39487	1	0.72381	1.27619	1.28696	0.5913	1.68116	0.44058	1.06522	0.93478	1.16779	0.83221	0.39344	0.78689	0.2623	2.55738	0.41284	1.58716	1.24171
	Pedacovirus	AlphaCoV_20724_95_MH687963	1.97193	0.16842	0.70175	1.15789	1.46622	0.53378	1.2233	0.7767	0.8	1.2	1.48016	0.51984	2.6755	0.15894	0.7351	0.43046	0.74118	1.25882	1.73258	0.74831	0.5191	0.94632	1.05368	0.49157	0.64578	0.75181	2.11084	0.6338	1.3662	1	0.75522	1.24478	1.28571	0.57143	1.88095	0.2619	1.07904	0.92096	1.24	0.76	0.51892	0.77838	0.25946	2.44324	0.42396	1.57604	1.27816
	Pedacovirus	AlphaCoV_20745_10_MH687964	1.97193	0.16842	0.70175	1.15789	1.46622	0.53378	1.22093	0.77907	0.8	1.2	1.48515	0.51485	2.67107	0.16529	0.73388	0.42975	0.74118	1.25882	1.73258	0.74831	0.5191	0.94632	1.05368	0.49157	0.64578	0.75181	2.11084	0.6338	1.3662	1	0.75665	1.24335	1.28571	0.57143	1.88095	0.2619	1.07904	0.92096	1.24832	0.75168	0.51892	0.77838	0.25946	2.44324	0.41475	1.58525	1.28111
	Pedacovirus	AlphaCoV_20745_17_MH687965	1.94286	0.16429	0.75	1.14286	1.49153	0.50847	1.23529	0.76471	0.82899	1.17101	1.536	0.464	2.6601	0.15107	0.70936	0.47947	0.77011	1.22989	1.67181	0.74009	0.58811	0.96634	1.03366	0.5808	0.68384	0.74005	1.99532	0.59382	1.40618	1	0.72692	1.27308	1.2907	0.5	1.95349	0.25581	1.08711	0.91289	1.28244	0.71756	0.55866	0.80447	0.2905	2.34637	0.40323	1.59677	1.20824
	Pedacovirus	AlphaCoV_20745_6_MH687966	2.01066	0.15631	0.70337	1.12966	1.51536	0.48464	1.24706	0.75294	0.79656	1.20344	1.53937	0.46063	2.67323	0.19704	0.67652	0.4532	0.73143	1.26857	1.69623	0.7184	0.58537	0.94422	1.05578	0.60235	0.74353	0.68706	1.96706	0.58824	1.41176	1	0.72968	1.27032	1.31765	0.49412	1.91765	0.27059	1.09091	0.90909	1.22963	0.77037	0.54545	0.81818	0.34091	2.29545	0.41176	1.58824	1.23288
	Pedacovirus	AlphaCoV_20745_8_MH687967	1.9788	0.16254	0.69965	1.15901	1.48123	0.51877	1.23471	0.76529	0.79083	1.20917	1.47667	0.52333	2.64874	0.18151	0.75294	0.41681	0.73939	1.26061	1.71625	0.76201	0.52174	0.94235	1.05765	0.47573	0.64078	0.74757	2.13592	0.63658	1.36342	1	0.75335	1.24665	1.25301	0.55422	1.92771	0.26506	1.07692	0.92308	1.24324	0.75676	0.50549	0.76923	0.26374	2.46154	0.42056	1.57944	1.28372
	Pedacovirus	BtCoV_008_16_M_bra_FIN_2016_MN065811	1.91424	0.27444	0.80274	1.00858	1.55333	0.44667	1.336	0.664	0.96359	1.03641	1.46693	0.53307	2.48595	0.2314	0.83306	0.44959	0.54167	1.45833	1.6031	0.82483	0.57206	0.71762	1.28238	0.55666	0.61233	0.50895	2.32207	0.72222	1.27778	1	0.55691	1.44309	1.22255	0.66469	1.89911	0.21365	0.94915	1.05085	1.0687	0.9313	0.32692	0.98077	0.34615	2.34615	0.50407	1.49593	1.16854
	Pedacovirus	BtCoV_020_16_M_dau_FIN_2016_MG923574	1.9798	0.13468	0.72054	1.16498	1.36634	0.63366	1.18876	0.81124	0.9496	1.0504	1.336	0.664	2.3612	0.20067	0.98328	0.45485	0.5977	1.4023	1.67722	0.68987	0.63291	0.80913	1.19087	0.55888	0.79042	0.53493	2.11577	0.71572	1.28428	1	0.73852	1.26148	1.62099	0.41983	1.80758	0.1516	0.83162	1.16838	1.12162	0.87838	0.35417	1.20833	0.33333	2.10417	0.62931	1.37069	1.23011
	Pedacovirus	BtSk-AlphaCoV_GX2018A_MK211369	1.88748	0.18149	0.76951	1.16152	1.46575	0.53425	1.27451	0.72549	0.82424	1.17576	1.49896	0.50104	2.62838	0.2027	0.80405	0.36486	0.74118	1.25882	1.69811	0.77123	0.53066	0.93651	1.06349	0.52658	0.63797	0.65823	2.17722	0.62103	1.37897	1	0.76893	1.23107	1.29341	0.51497	1.94012	0.2515	1.12057	0.87943	1.29167	0.70833	0.53933	0.85393	0.20225	2.40449	0.45714	1.54286	1.26714
	Pedacovirus	BtSk-AlphaCoV_GX2018B_MK211370	1.875	0.20588	0.75735	1.16176	1.46075	0.53925	1.2681	0.7319	0.82635	1.17365	1.49068	0.50932	2.62606	0.20981	0.79188	0.37225	0.78788	1.21212	1.69905	0.77488	0.52607	0.93069	1.06931	0.57143	0.67347	0.63265	2.12245	0.59512	1.40488	1	0.74952	1.25048	1.30149	0.51343	1.95821	0.22687	1.11111	0.88889	1.27891	0.72109	0.49718	0.76836	0.24859	2.48588	0.42654	1.57346	1.26415
	Pedacovirus	BtSk-AlphaCoV_GX2018C_MK211371	1.96364	0.16	0.71273	1.16364	1.45205	0.54795	1.25146	0.74854	0.82036	1.17964	1.49897	0.50103	2.65986	0.21088	0.73469	0.39456	0.79762	1.20238	1.67972	0.77419	0.54608	0.94	1.06	0.52525	0.59596	0.68687	2.19192	0.59406	1.40594	1	0.72486	1.27514	1.2568	0.50755	1.96979	0.26586	1.07143	0.92857	1.28859	0.71141	0.48	0.96	0.20571	2.35429	0.39423	1.60577	1.25768
	Pedacovirus	BtSk-AlphaCoV_GX2018D_MK211372	1.92674	0.14652	0.77656	1.15018	1.49481	0.50519	1.28094	0.71906	0.82175	1.17825	1.54865	0.45135	2.60465	0.19269	0.77741	0.42525	0.66667	1.33333	1.68618	0.77283	0.54098	0.93812	1.06188	0.58968	0.68796	0.62899	2.09337	0.618	1.382	1	0.73973	1.26027	1.28235	0.51765	1.94118	0.25882	1.07581	0.92419	1.27007	0.72993	0.57143	0.7381	0.19048	2.5	0.38627	1.61373	1.1831
	Pedacovirus	Scotophilus_kuhlii_bat_coronavirus_512-related_HK140714_MN611521	1.94118	0.16176	0.77941	1.11765	1.50508	0.49492	1.25749	0.74251	0.77711	1.22289	1.49312	0.50688	2.62273	0.21087	0.73806	0.42834	0.74444	1.25556	1.70362	0.74661	0.54977	0.94523	1.05477	0.55814	0.71628	0.67907	2.04651	0.63039	1.36961	1	0.76923	1.23077	1.34513	0.47198	1.9115	0.27139	1.07746	0.92254	1.2327	0.7673	0.52571	0.77714	0.29714	2.4	0.40833	1.59167	1.22247
	Rhinacovirus	BtRf-AlphaCoV_YN2012_KJ473808	2.32014	0.21343	0.46816	0.99828	1.5945	0.4055	1.33203	0.66797	0.92593	1.07407	1.7182	0.2818	2.89679	0.10152	0.65651	0.34518	0.4	1.6	2.02439	0.65854	0.31707	1.00402	0.99598	0.59716	0.38863	0.29384	2.72038	1.05882	0.94118	1	0.53543	1.46457	1.2349	0.44295	2.13423	0.18792	0.83268	1.16732	1.14504	0.85496	0.20225	0.65169	0.22472	2.92135	0.41202	1.58798	1.12532
	Rhinacovirus	BtRf-AlphaCoV_YN2012_NC_028824	2.32014	0.21343	0.46816	0.99828	1.5945	0.4055	1.33203	0.66797	0.92593	1.07407	1.7182	0.2818	2.89679	0.10152	0.65651	0.34518	0.4	1.6	2.02439	0.65854	0.31707	1.00402	0.99598	0.59716	0.38863	0.29384	2.72038	1.05882	0.94118	1	0.53543	1.46457	1.2349	0.44295	2.13423	0.18792	0.83268	1.16732	1.14504	0.85496	0.20225	0.65169	0.22472	2.92135	0.41202	1.58798	1.12532
	Rhinacovirus	Rhinolophus_affinis_bat_coronavirus_HKU2-related_160660_MN611522	2.23586	0.28433	0.5105	0.96931	1.46358	0.53642	1.25573	0.74427	1.05031	0.94969	1.63465	0.36535	2.65552	0.2408	0.80268	0.301	0.49162	1.50838	1.95852	0.62882	0.41266	0.73444	1.26556	0.55142	0.52516	0.42013	2.50328	0.82759	1.17241	1	0.53689	1.46311	1.16721	0.43279	2.12459	0.27541	0.77291	1.22709	1	1	0.30769	0.82051	0.30769	2.5641	0.48387	1.51613	1.11675
	Rhinacovirus	Swine_acute_diarrhea_syndrome_related_coronavirus_141388_MF094687	2.28385	0.24144	0.50245	0.97227	1.45638	0.54362	1.23864	0.76136	1.02736	0.97264	1.63985	0.36015	2.81282	0.1484	0.72175	0.31703	0.54545	1.45455	1.90604	0.67785	0.41611	0.85657	1.14343	0.4878	0.4878	0.44346	2.58093	0.79279	1.20721	1	0.56452	1.43548	1.12583	0.46358	2.17219	0.23841	0.83398	1.16602	1.17986	0.82014	0.28571	0.81319	0.17582	2.72527	0.50862	1.49138	1.0844
	Rhinacovirus	Swine_acute_diarrhea_syndrome_related_coronavirus_162140_MF094688	2.29677	0.23871	0.50323	0.96129	1.43144	0.56856	1.23194	0.76806	1.04192	0.95808	1.64338	0.35662	2.81407	0.1407	0.71692	0.32831	0.58757	1.41243	1.90423	0.67483	0.42094	0.86627	1.13373	0.49565	0.46957	0.47826	2.55652	0.77714	1.22286	1	0.55823	1.44177	1.16388	0.44147	2.15385	0.2408	0.84615	1.15385	1.14483	0.85517	0.26374	0.83516	0.1978	2.7033	0.49372	1.50628	1.10891
	Rhinacovirus	Swine_acute_diarrhea_syndrome_related_coronavirus_8462_MF094685	2.3104	0.2368	0.5376	0.9152	1.44186	0.55814	1.25758	0.74242	1.03303	0.96697	1.64246	0.35754	2.84175	0.12795	0.7138	0.3165	0.53107	1.46893	1.9026	0.64286	0.45455	0.87525	1.12475	0.52248	0.41113	0.42827	2.63812	0.77551	1.22449	1	0.54473	1.45527	1.13355	0.36482	2.20195	0.29967	0.84375	1.15625	1.16176	0.83824	0.27957	0.88172	0.25806	2.58065	0.52101	1.47899	1.11721
	Rhinacovirus	Swine_acute_diarrhea_syndrome_related_coronavirus_8495_MF094686	2.29856	0.25682	0.52648	0.91814	1.42953	0.57047	1.23282	0.76718	1.09422	0.90578	1.60762	0.39238	2.80405	0.13514	0.7027	0.35811	0.52326	1.47674	1.90728	0.64901	0.44371	0.84585	1.15415	0.48998	0.49889	0.41871	2.59243	0.80952	1.19048	1	0.57317	1.42683	1.0719	0.44444	2.23529	0.24837	0.86154	1.13846	1.18519	0.81481	0.3027	0.73514	0.21622	2.74595	0.52361	1.47639	1.06122
	Serbecovirus	BtRl-BetaCoV_SC2018_MK211374	2.0093	0.29147	0.62016	1.07907	1.30909	0.69091	1.27615	0.72385	0.90602	1.09398	1.23218	0.76782	2.05072	0.17391	0.88406	0.8913	0.64407	1.35593	1.66154	0.62637	0.71209	1.09843	0.90157	0.69434	0.84528	0.59623	1.86415	1.02932	0.97068	1	0.74694	1.25306	1.62674	0.49025	1.67131	0.2117	1.17302	0.82698	1.36	0.64	0.4	1.26667	0.24444	2.08889	0.59649	1.40351	1.41761
	Serbecovirus	BtRs-BetaCoV_YN2018A_MK211375	2.21198	0.18433	0.52842	1.07527	1.21455	0.78545	1.20654	0.79346	0.85854	1.14146	1.22611	0.77389	2.06171	0.15971	0.85662	0.92196	0.68927	1.31073	1.6351	0.60277	0.76212	1.07298	0.92702	0.75514	0.88224	0.56822	1.79439	0.98658	1.01342	1	0.75214	1.24786	1.72853	0.48753	1.63989	0.14404	1.125	0.875	1.49112	0.50888	0.46409	1.12707	0.1547	2.25414	0.60227	1.39773	1.62617
	Serbecovirus	BtRs-BetaCoV_YN2018B_MK211376	2.16794	0.21985	0.50687	1.10534	1.2491	0.7509	1.25562	0.74438	0.91566	1.08434	1.25676	0.74324	1.99286	0.16429	0.92143	0.92143	0.68132	1.31868	1.70548	0.62329	0.67123	1.08738	0.91262	0.74862	0.85872	0.60183	1.79083	0.99342	1.00658	1	0.75356	1.24644	1.68533	0.46933	1.67467	0.17067	1.22086	0.77914	1.42373	0.57627	0.47059	1.15294	0.11765	2.25882	0.61176	1.38824	1.56208
	Serbecovirus	BtRs-BetaCoV_YN2018C_MK211377	2.18182	0.20606	0.52121	1.09091	1.25818	0.74182	1.19836	0.80164	0.92048	1.07952	1.23326	0.76674	1.97477	0.17297	0.92973	0.92252	0.68539	1.31461	1.68578	0.59862	0.7156	1.09162	0.90838	0.72928	0.90608	0.56722	1.79742	0.98361	1.01639	1	0.75833	1.24167	1.68595	0.45179	1.69697	0.16529	1.15789	0.84211	1.47977	0.52023	0.45455	1.09091	0.13636	2.31818	0.5977	1.4023	1.62929
	Serbecovirus	BtRs-BetaCoV_YN2018D_MK211378	2.14395	0.23277	0.55743	1.06585	1.25362	0.74638	1.16632	0.83368	0.89952	1.10048	1.24942	0.75058	1.96377	0.19565	0.93478	0.9058	0.63333	1.36667	1.70159	0.63554	0.66287	1.10291	0.89709	0.74453	0.82482	0.59124	1.83942	0.98316	1.01684	1	0.73529	1.26471	1.7377	0.43716	1.68306	0.14208	1.15569	0.84431	1.46199	0.53801	0.45977	1.12644	0.13793	2.27586	0.62069	1.37931	1.59633
	Serbecovirus	Cp_Yunnan2011_JX993988	2.15569	0.24551	0.57485	1.02395	1.23022	0.76978	1.1498	0.8502	0.90353	1.09647	1.23282	0.76718	1.92619	0.12654	0.95606	0.99121	0.69189	1.30811	1.68354	0.6519	0.66456	1.09021	0.90979	0.66426	0.83032	0.63538	1.87004	1.03185	0.96815	1	0.72016	1.27984	1.6129	0.45161	1.78495	0.15054	1.18519	0.81481	1.4269	0.5731	0.51111	1.06667	0.17778	2.24444	0.54945	1.45055	1.61758
	Serbecovirus	Rp_Shaanxi2011_JX993987	2.08748	0.25339	0.56109	1.09804	1.22143	0.77857	1.15353	0.84647	0.87037	1.12963	1.19457	0.80543	1.83244	0.16399	1.03387	0.9697	0.77419	1.22581	1.67024	0.62955	0.70021	1.11069	0.88931	0.71848	0.83592	0.6494	1.7962	0.95862	1.04138	1	0.79837	1.20163	1.55496	0.51475	1.6193	0.31099	1.18052	0.81948	1.34911	0.65089	0.36364	1.5	0.25	1.88636	0.67391	1.32609	1.59111
	Serbecovirus	BtRf-HeB2013_KJ473812	1.95821	0.28657	0.61493	1.1403	1.24092	0.75908	1.11198	0.88802	0.8211	1.1789	1.23013	0.76987	1.94502	0.13746	0.93471	0.98282	0.6911	1.3089	1.64417	0.70552	0.65031	1.1216	0.8784	0.7	0.93333	0.52	1.84667	1.09259	0.90741	1	0.79042	1.20958	1.57975	0.48608	1.61013	0.32405	1.1922	0.8078	1.38122	0.61878	0.45161	1.03226	0.23656	2.27957	0.59893	1.40107	1.45376
	Serbecovirus	BtRf-JL2012_KJ473811	1.97101	0.30725	0.57971	1.14203	1.25753	0.74247	1.12741	0.87259	0.84071	1.15929	1.22222	0.77778	1.94502	0.17869	0.90034	0.97595	0.76238	1.23762	1.66208	0.70727	0.63065	1.10105	0.89895	0.7488	0.896	0.608	1.7472	1.0379	0.9621	1	0.81188	1.18812	1.54902	0.41176	1.7549	0.28431	1.16442	0.83558	1.32203	0.67797	0.45596	1.05699	0.2487	2.23834	0.63	1.37	1.44915
	Serbecovirus	BtRf-SX2013_KJ473813	1.95796	0.28829	0.61862	1.13514	1.24342	0.75658	1.10454	0.89546	0.81379	1.18621	1.23333	0.76667	1.94148	0.14458	0.92943	0.98451	0.67708	1.32292	1.65369	0.70697	0.63934	1.12	0.88	0.69477	0.9511	0.51939	1.83474	1.10703	0.89297	1	0.79283	1.20717	1.56962	0.4962	1.61013	0.32405	1.18663	0.81337	1.38462	0.61538	0.45161	1.01075	0.23656	2.30108	0.60638	1.39362	1.44206
	Serbecovirus	BtRs-GX2013_KJ473815	2.11255	0.19048	0.58297	1.114	1.25503	0.74497	1.18359	0.81641	0.89038	1.10962	1.18201	0.81799	1.89041	0.16438	1	0.94521	0.71795	1.28205	1.65708	0.64682	0.6961	1.13966	0.86034	0.81345	0.74622	0.52437	1.91597	1.01205	0.98795	1	0.72047	1.27953	1.62468	0.44216	1.77892	0.15424	1.19891	0.80109	1.42564	0.57436	0.42697	1.14607	0.20225	2.22472	0.62366	1.37634	1.59825
	Serbecovirus	BtRs-HuB2013_KJ473814	2.00871	0.19158	0.6328	1.16691	1.18121	0.81879	1.14851	0.85149	0.94989	1.05011	1.14894	0.85106	1.91667	0.16667	0.98611	0.93056	0.63682	1.36318	1.65663	0.65663	0.68675	1.08519	0.91481	0.80129	0.80129	0.60097	1.79645	0.9699	1.0301	1	0.832	1.168	1.68957	0.49873	1.58779	0.22392	1.13812	0.86188	1.44681	0.55319	0.44199	1.17127	0.1326	2.25414	0.73016	1.26984	1.4902
	Serbecovirus	BtRs-YN2013_KJ473816	2.12164	0.22065	0.55446	1.10325	1.26421	0.73579	1.22682	0.77318	0.94144	1.05856	1.24416	0.75584	2.02768	0.13149	0.92042	0.92042	0.72	1.28	1.64969	0.67821	0.6721	1.06792	0.93208	0.73877	0.79867	0.56572	1.89684	0.9939	1.0061	1	0.73956	1.26044	1.66921	0.43766	1.66921	0.22392	1.16	0.84	1.50265	0.49735	0.47059	1.09091	0.2139	2.2246	0.6455	1.3545	1.54839
	Serbecovirus	Bat_SARS_coronavirus_HKU3-1_DQ022305	1.9738	0.26783	0.623	1.13537	1.31126	0.68874	1.16078	0.83922	0.89565	1.10435	1.19149	0.80851	1.93103	0.23448	0.90345	0.93103	0.65306	1.34694	1.60206	0.6866	0.71134	1.08287	0.91713	0.7619	0.82102	0.59113	1.82594	1.06667	0.93333	1	0.732	1.268	1.57761	0.48855	1.73028	0.20356	1.13636	0.86364	1.54945	0.45055	0.47312	1.16129	0.23656	2.12903	0.60513	1.39487	1.57018
	Serbecovirus	Bat_SARS_CoV_Rf1_2004_DQ412042	1.96522	0.31304	0.57971	1.14203	1.25902	0.74098	1.09198	0.90802	0.84045	1.15955	1.23909	0.76091	1.95556	0.17094	0.88889	0.98462	0.75622	1.24378	1.70825	0.70624	0.58551	1.11348	0.88652	0.71154	0.97436	0.58333	1.73077	1.05075	0.94925	1	0.80159	1.19841	1.58025	0.51358	1.62963	0.27654	1.1715	0.8285	1.35829	0.64171	0.45652	1.1087	0.19565	2.23913	0.60733	1.39267	1.44099
	Serbecovirus	Bat_SARS_CoV_Rm1_2004_DQ412043	1.96862	0.22825	0.66762	1.13552	1.21212	0.78788	1.13725	0.86275	0.90446	1.09554	1.13866	0.86134	1.94801	0.18024	0.90121	0.97054	0.63265	1.36735	1.7446	0.66601	0.58939	1.10219	0.89781	0.78457	0.91961	0.58521	1.71061	0.99692	1.00308	1	0.78471	1.21529	1.66076	0.54684	1.57975	0.21266	1.18699	0.81301	1.43005	0.56995	0.50273	1.26776	0.13115	2.09836	0.6701	1.3299	1.57734
	Serbecovirus	Bat_SARS_CoV_Rp3_2004_DQ071615	2.09986	0.22254	0.52496	1.15264	1.20805	0.79195	1.21176	0.78824	0.8671	1.1329	1.2334	0.7666	1.95848	0.17301	0.89965	0.96886	0.69268	1.30732	1.62622	0.69863	0.67515	1.06227	0.93773	0.864	0.8704	0.5952	1.6704	0.97452	1.02548	1	0.75502	1.24498	1.75879	0.46231	1.63819	0.1407	1.184	0.816	1.44211	0.55789	0.51613	0.98925	0.19355	2.30108	0.61458	1.38542	1.65053
	Serbecovirus	Bat_coronavirus_RaTG13_MN996532	2.14529	0.11747	0.61824	1.11901	1.51186	0.48814	1.30604	0.69396	0.61187	1.38813	1.35102	0.64898	2.32753	0.1115	0.65505	0.90592	0.57143	1.42857	1.61315	0.87621	0.51064	1.35702	0.64298	0.85496	0.65649	0.35878	2.12977	1.19704	0.80296	1	0.60342	1.39658	1.61616	0.25253	1.94949	0.18182	1.35912	0.64088	1.47	0.53	0.49315	0.93151	0.24658	2.32877	0.50256	1.49744	1.56522
	Serbecovirus	Bat_SARS-like_coronavirus_As6526_KY417142	2.16978	0.20144	0.5295	1.09928	1.22667	0.77333	1.19149	0.80851	0.87805	1.12195	1.22363	0.77637	1.9244	0.17182	0.97595	0.92784	0.66995	1.33005	1.67665	0.64671	0.67665	1.08759	0.91241	0.76316	0.83553	0.58553	1.81579	1	1	1	0.73896	1.26104	1.71859	0.46231	1.57789	0.24121	1.16354	0.83646	1.44385	0.55615	0.4973	1.12432	0.10811	2.27027	0.60317	1.39683	1.65106
	Serbecovirus	Bat_SARS-like_coronavirus_bat-SL-CoVZC45_MG772933	2.1018	0.24551	0.53293	1.11976	1.45151	0.54849	1.22645	0.77355	0.73497	1.26503	1.32377	0.67623	2.15385	0.1641	0.76581	0.91624	0.62069	1.37931	1.57225	0.86705	0.56069	1.19435	0.80565	0.6963	0.78519	0.48889	2.02963	1.0687	0.9313	1	0.66542	1.33458	1.58396	0.3609	1.80451	0.25063	1.24518	0.75482	1.53	0.47	0.50331	0.98013	0.15894	2.35762	0.42553	1.57447	1.55603
	Serbecovirus	Bat_SARS-like_coronavirus_bat-SL-CoVZXC21_MG772934	2.10843	0.24096	0.51807	1.13253	1.45151	0.54849	1.22954	0.77046	0.75506	1.24494	1.34146	0.65854	2.14802	0.15146	0.77108	0.92943	0.64356	1.35644	1.59696	0.85551	0.54753	1.18784	0.81216	0.70764	0.78212	0.46182	2.04842	1.14286	0.85714	1	0.70566	1.29434	1.61637	0.39898	1.79028	0.19437	1.28177	0.71823	1.51724	0.48276	0.44737	1.07895	0.15789	2.31579	0.42051	1.57949	1.50847
	Serbecovirus	Bat_SARS-like_coronavirus_Longquan-140_KF294457	2.11544	0.28705	0.56786	1.02964	1.319	0.681	1.21353	0.78647	0.89461	1.10539	1.24027	0.75973	1.92432	0.25225	0.87928	0.94414	0.61538	1.38462	1.65517	0.65517	0.68966	1.12665	0.87335	0.73835	0.73118	0.59498	1.93548	0.96928	1.03072	1	0.78008	1.21992	1.57609	0.43478	1.77174	0.21739	1.10429	0.89571	1.52874	0.47126	0.48837	1.23256	0.18605	2.09302	0.5618	1.4382	1.56522
	Serbecovirus	Bat_SARS-like_coronavirus_Rf4092_KY417145	2.12164	0.20368	0.54314	1.13154	1.24832	0.75168	1.19765	0.80235	0.9095	1.0905	1.19745	0.80255	1.99322	0.16271	0.95593	0.88814	0.71845	1.28155	1.64729	0.67335	0.67936	1.07063	0.92937	0.75941	0.83142	0.56956	1.83961	0.95238	1.04762	1	0.79523	1.20477	1.71139	0.43544	1.67089	0.18228	1.15934	0.84066	1.43169	0.56831	0.54737	1.09474	0.16842	2.18947	0.63874	1.36126	1.62741
	Serbecovirus	Bat_SARS-like_coronavirus_Rs4081_KY417143	2.10678	0.20202	0.56566	1.12554	1.23333	0.76667	1.21923	0.78077	0.88496	1.11504	1.23404	0.76596	1.92414	0.17241	0.97931	0.92414	0.67961	1.32039	1.69901	0.67129	0.6297	1.09091	0.90909	0.73322	0.83142	0.59574	1.83961	0.96049	1.03951	1	0.74502	1.25498	1.74	0.44	1.62	0.2	1.14674	0.85326	1.45161	0.54839	0.47826	1.08696	0.15217	2.28261	0.64894	1.35106	1.6051
	Serbecovirus	Bat_SARS-like_coronavirus_Rs4084_KY417144	2.11765	0.21808	0.52224	1.14204	1.21967	0.78033	1.22093	0.77907	0.93636	1.06364	1.25367	0.74633	2.01704	0.17717	0.87905	0.92675	0.72816	1.27184	1.67735	0.67335	0.6493	1.06715	0.93285	0.79739	0.81046	0.5817	1.81046	0.97947	1.02053	1	0.78764	1.21236	1.71852	0.44444	1.64938	0.18765	1.19337	0.80663	1.43299	0.56701	0.51977	1.10734	0.15819	2.21469	0.65556	1.34444	1.51464
	Serbecovirus	Bat_SARS-like_coronavirus_Rs4231_KY417146	2.11833	0.21934	0.54834	1.114	1.21711	0.78289	1.19084	0.80916	0.91071	1.08929	1.26033	0.73967	1.95238	0.18367	0.92517	0.93878	0.69903	1.30097	1.68119	0.66535	0.65347	1.0713	0.9287	0.77741	0.87708	0.53821	1.80731	0.99405	1.00595	1	0.73228	1.26772	1.70297	0.38614	1.69307	0.21782	1.17582	0.82418	1.41489	0.58511	0.49162	1.09497	0.15642	2.25698	0.61538	1.38462	1.60499
	Serbecovirus	Bat_SARS-like_coronavirus_Rs4237_KY417147	2.16619	0.23496	0.53295	1.0659	1.20401	0.79599	1.19846	0.80154	0.86414	1.13586	1.27119	0.72881	1.94836	0.16523	0.95009	0.93632	0.65347	1.34653	1.644	0.678	0.678	1.10219	0.89781	0.75248	0.82508	0.58746	1.83498	1.003	0.997	1	0.72	1.28	1.75315	0.44332	1.61209	0.19144	1.15591	0.84409	1.39267	0.60733	0.47568	1.05946	0.15135	2.31351	0.56545	1.43455	1.63907
	Serbecovirus	Bat_SARS-like_coronavirus_Rs4247_KY417148	2.11867	0.19682	0.57308	1.11143	1.18937	0.81063	1.22308	0.77692	0.87305	1.12695	1.23729	0.76271	1.94836	0.16523	0.9432	0.9432	0.67317	1.32683	1.65868	0.67665	0.66467	1.05495	0.94505	0.76066	0.83934	0.57705	1.82295	0.96657	1.03343	1	0.72763	1.27237	1.77889	0.42211	1.59799	0.20101	1.13208	0.86792	1.43617	0.56383	0.45405	1.03784	0.17297	2.33514	0.57895	1.42105	1.64905
	Serbecovirus	Bat_SARS-like_coronavirus_Rs4255_KY417149	2.12104	0.19597	0.5879	1.0951	1.22	0.78	1.16342	0.83658	0.89135	1.10865	1.26271	0.73729	1.9244	0.19931	0.97595	0.90034	0.657	1.343	1.68164	0.68555	0.63281	1.10018	0.89982	0.75372	0.81983	0.56198	1.86446	0.9759	1.0241	1	0.74059	1.25941	1.72292	0.39295	1.66247	0.22166	1.14441	0.85559	1.43455	0.56545	0.46154	1.14286	0.15385	2.24176	0.58511	1.41489	1.60169
	Serbecovirus	Bat_SARS-like_coronavirus_Rs4874_KY417150	2.08845	0.21683	0.54779	1.14693	1.23127	0.76873	1.22667	0.77333	0.90949	1.09051	1.27163	0.72837	1.90285	0.1943	0.97822	0.92462	0.68269	1.31731	1.68786	0.66474	0.6474	1.07441	0.92559	0.76774	0.83871	0.5871	1.80645	0.9881	1.0119	1	0.71538	1.28462	1.71429	0.37772	1.72397	0.18402	1.2043	0.7957	1.42268	0.57732	0.47826	1.1087	0.19565	2.21739	0.6383	1.3617	1.6
	Serbecovirus	Bat_SARS-like_coronavirus_Rs7327_KY417151	2.09687	0.19943	0.53561	1.16809	1.22977	0.77023	1.22371	0.77629	0.91796	1.08204	1.256	0.744	1.92321	0.16694	0.98164	0.92821	0.67961	1.32039	1.65577	0.68077	0.66346	1.05546	0.94454	0.8065	0.82602	0.55285	1.81463	1.01149	0.98851	1	0.74667	1.25333	1.7554	0.39329	1.65947	0.19185	1.19467	0.80533	1.40206	0.59794	0.51892	1.14595	0.15135	2.18378	0.6455	1.3545	1.59343
	Serbecovirus	Bat_SARS-like_coronavirus_Rs9401_KY417152	2.12754	0.2029	0.52754	1.14203	1.23432	0.76568	1.23225	0.76775	0.91759	1.08241	1.28542	0.71458	1.95571	0.15673	0.93356	0.954	0.68293	1.31707	1.67857	0.68452	0.6369	1.07326	0.92674	0.76821	0.88079	0.56291	1.78808	0.98817	1.01183	1	0.74175	1.25825	1.78102	0.37956	1.64477	0.19465	1.20225	0.79775	1.40206	0.59794	0.49438	1.1236	0.13483	2.24719	0.61111	1.38889	1.59322
	Serbecovirus	Bat_SARS-like_coronavirus_Rs3367_Rs3367_KC881006	2.14224	0.23222	0.50508	1.12046	1.21854	0.78146	1.23225	0.76775	0.91723	1.08277	1.26446	0.73554	1.93857	0.17065	0.93515	0.95563	0.68293	1.31707	1.68972	0.67589	0.63439	1.08958	0.91042	0.80132	0.82781	0.55629	1.81457	0.9645	1.0355	1	0.75097	1.24903	1.7549	0.40196	1.65686	0.18627	1.2312	0.7688	1.41538	0.58462	0.49438	1.19101	0.13483	2.17978	0.61878	1.38122	1.54947
	Serbecovirus	Bat_SARS-like_coronavirus_RsSHC014_RsSHC014_KC881005	2.10405	0.21387	0.53179	1.15029	1.22112	0.77888	1.22244	0.77756	0.93512	1.06488	1.24426	0.75574	1.96944	0.16978	0.89643	0.96435	0.71845	1.28155	1.692	0.672	0.636	1.08394	0.91606	0.80263	0.81579	0.58553	1.79605	0.99408	1.00592	1	0.77193	1.22807	1.76039	0.43032	1.63325	0.17604	1.21111	0.78889	1.44211	0.55789	0.49162	1.18436	0.13408	2.18994	0.61878	1.38122	1.52818
	Serbecovirus	Bat_SARS-like_coronavirus_WIV1_WIV1_KF367457	2.13603	0.23155	0.50941	1.12301	1.22623	0.77377	1.23136	0.76864	0.91759	1.08241	1.27088	0.72912	1.93939	0.17508	0.93603	0.94949	0.69565	1.30435	1.68824	0.68235	0.62941	1.08958	0.91042	0.81833	0.81833	0.54992	1.81342	0.97093	1.02907	1	0.74856	1.25144	1.73786	0.39806	1.68932	0.17476	1.22314	0.77686	1.41414	0.58586	0.49162	1.18436	0.15642	2.1676	0.64171	1.35829	1.55975
	Serbecovirus	Bat_SARS-like_coronavirus_YNLF_31C_YNLF_31C_KP886808	2.04993	0.21145	0.60499	1.13363	1.30233	0.69767	1.23564	0.76436	0.90541	1.09459	1.24843	0.75157	2.01379	0.17241	0.91724	0.89655	0.67347	1.32653	1.70221	0.65191	0.64588	1.11317	0.88683	0.69863	0.89041	0.5411	1.86986	1.02367	0.97633	1	0.75591	1.24409	1.72165	0.45361	1.65979	0.16495	1.15934	0.84066	1.45556	0.54444	0.52083	1	0.16667	2.3125	0.54167	1.45833	1.61207
	Serbecovirus	Bat_SARS-like_coronavirus_YNLF_34C_YNLF_34C_KP886809	2.0438	0.21022	0.61314	1.13285	1.29966	0.70034	1.2381	0.7619	0.90745	1.09255	1.24481	0.75519	2.01384	0.17301	0.92042	0.89273	0.66667	1.33333	1.70648	0.6498	0.64372	1.11317	0.88683	0.69655	0.89655	0.54483	1.86207	1.02976	0.97024	1	0.75494	1.24506	1.73196	0.45361	1.63918	0.17526	1.15702	0.84298	1.44751	0.55249	0.50526	1.01053	0.16842	2.31579	0.53403	1.46597	1.60521
	Serbecovirus	Rhinolophus_affinis_coronavirus_LYRa11_KF569996	2.12571	0.26286	0.55429	1.05714	1.23934	0.76066	1.24521	0.75479	0.87689	1.12311	1.19835	0.80165	1.92821	0.13675	0.92308	1.01197	0.62687	1.37313	1.69261	0.68288	0.62451	1.10741	0.89259	0.72013	0.85761	0.60229	1.81997	1.00917	0.99083	1	0.70175	1.29825	1.57282	0.49515	1.76699	0.16505	1.1752	0.8248	1.43617	0.56383	0.5	1.11364	0.11364	2.27273	0.58564	1.41436	1.58298
	Serbecovirus	SARS_coronavirus_Rs_672_2006_Rs672_FJ588686	2.09971	0.18182	0.60997	1.1085	1.18243	0.81757	1.20477	0.79523	0.88889	1.11111	1.23312	0.76688	1.97557	0.17452	0.91449	0.93543	0.66337	1.33663	1.69355	0.65927	0.64718	1.0838	0.9162	0.8	0.8595	0.56198	1.77851	0.97196	1.02804	1	0.76327	1.23673	1.68312	0.43636	1.71429	0.16623	1.15556	0.84444	1.45652	0.54348	0.50273	1.0929	0.15301	2.25137	0.60638	1.39362	1.5794
	Serbecovirus	Severe_acute_respiratory_syndrome-related_coronavirus_BtKY72_KY352407	2.04348	0.2236	0.60248	1.13043	1.48649	0.51351	1.22179	0.77821	0.80397	1.19603	1.40452	0.59548	2.29167	0.13194	0.84722	0.72917	0.54726	1.45274	1.49414	1.07813	0.42773	1.14176	0.85824	0.81423	0.63241	0.56126	1.99209	1.08796	0.91204	1	0.61896	1.38104	1.30184	0.35696	2.09974	0.24147	1.1405	0.8595	1.36082	0.63918	0.41212	1.11515	0.33939	2.13333	0.59898	1.40102	1.47505
	Serbecovirus	Severe_acute_respiratory_syndrome-related_coronavirus_Rc-o319_LC556375	1.98209	0.16716	0.54925	1.30149	1.2381	0.7619	1.2016	0.7984	0.78458	1.21542	1.23441	0.76559	2.08219	0.15068	0.81507	0.95205	0.71569	1.28431	1.47284	0.96579	0.56137	1.15412	0.84588	0.8367	0.77064	0.5578	1.83486	1	1	1	0.73123	1.26877	1.63683	0.36829	1.70844	0.28645	1.21111	0.78889	1.56863	0.43137	0.51701	1.17007	0.13605	2.17687	0.59259	1.40741	1.51812
	Serbecovirus	Bat_coronavirus_Anlong-103_KY770858	2.15478	0.22458	0.54021	1.08042	1.2674	0.7326	1.18012	0.81988	0.89048	1.10952	1.21995	0.78005	2.01802	0.17297	0.90811	0.9009	0.64444	1.35556	1.65	0.65455	0.69545	1.07171	0.92829	0.77348	0.85451	0.54512	1.82689	0.98077	1.01923	1	0.69835	1.30165	1.68306	0.43716	1.72678	0.15301	1.13415	0.86585	1.44828	0.55172	0.52747	1.12088	0.1978	2.15385	0.58427	1.41573	1.55856
	Serbecovirus	Bat_coronavirus_Anlong-112_KY770859	2.15478	0.22458	0.54021	1.08042	1.27473	0.72527	1.18182	0.81818	0.89048	1.10952	1.22273	0.77727	2.01802	0.17297	0.90811	0.9009	0.64804	1.35196	1.64932	0.65158	0.6991	1.06746	0.93254	0.77064	0.85872	0.54312	1.82752	0.98077	1.01923	1	0.6971	1.3029	1.68767	0.43836	1.72055	0.15342	1.13761	0.86239	1.44828	0.55172	0.52459	1.0929	0.21858	2.16393	0.57627	1.42373	1.55856
	Serbecovirus	Bat_coronavirus_Jiyuan-84_KY770860	1.94953	0.27129	0.63091	1.14826	1.26429	0.73571	1.11111	0.88889	0.80488	1.19512	1.22299	0.77701	1.93153	0.15135	0.93694	0.98018	0.75	1.25	1.65376	0.69021	0.65604	1.11787	0.88213	0.65201	0.98901	0.5348	1.82418	1.07947	0.92053	1	0.78407	1.21593	1.6	0.48889	1.64444	0.26667	1.17507	0.82493	1.41463	0.58537	0.38636	1	0.22727	2.38636	0.63277	1.36723	1.40179
	Serbecovirus	Bat_coronavirus_JTMC15_KU182964	1.95252	0.2908	0.60534	1.15134	1.24658	0.75342	1.12676	0.87324	0.84507	1.15493	1.23629	0.76371	1.96174	0.18087	0.89043	0.96696	0.77157	1.22843	1.64909	0.6998	0.65112	1.0989	0.9011	0.73684	0.88816	0.58553	1.78947	1.05045	0.94955	1	0.81707	1.18293	1.49871	0.4031	1.79845	0.29974	1.16111	0.83889	1.32948	0.67052	0.4492	1.06952	0.23529	2.24599	0.63918	1.36082	1.41739
	Serbecovirus	BtCoV_BM48-31_BGR_2008_GU190215	2.06042	0.29003	0.64048	1.00906	1.34021	0.65979	1.22505	0.77495	0.8313	1.1687	1.39715	0.60285	2.16609	0.13841	0.89273	0.80277	0.7	1.3	1.6879	0.84076	0.47134	1.04598	0.95402	0.72795	0.66041	0.50281	2.10882	1.01538	0.98462	1	0.73888	1.26112	1.24934	0.43045	2.09974	0.22047	1.02065	0.97935	1.40331	0.59669	0.48619	0.99448	0.22099	2.29834	0.55497	1.44503	1.40471
	Serbecovirus	BtCoV_BM48-31_BGR_2008_NC_014470	2.06042	0.29003	0.64048	1.00906	1.34021	0.65979	1.22505	0.77495	0.8313	1.1687	1.39715	0.60285	2.16609	0.13841	0.89273	0.80277	0.7	1.3	1.6879	0.84076	0.47134	1.04598	0.95402	0.72795	0.66041	0.50281	2.10882	1.01538	0.98462	1	0.73888	1.26112	1.24934	0.43045	2.09974	0.22047	1.02065	0.97935	1.40331	0.59669	0.48619	0.99448	0.22099	2.29834	0.55497	1.44503	1.40471
	Setracovirus	NL63-related_bat_coronavirus-BtKYNL63-15_KY073746	2.0155	0.31628	0.8	0.86822	1.40484	0.59516	1.14836	0.85164	1.06775	0.93225	1.4636	0.5364	2.64883	0.21405	0.81605	0.32107	0.77381	1.22619	1.64403	0.68852	0.66745	0.91881	1.08119	0.31276	0.70782	0.83951	2.13992	0.48503	1.51497	1	0.87023	1.12977	1.12953	0.72539	1.8342	0.31088	1.05755	0.94245	0.92174	1.07826	0.31858	1.04425	0.28319	2.35398	0.59031	1.40969	0.85047
	Setracovirus	NL63-related_bat_coronavirus-BtKYNL63-9a_KY073744	2.04894	0.24144	0.71126	0.99837	1.57491	0.42509	1.23107	0.76893	0.74644	1.25356	1.52345	0.47655	2.81154	0.14261	0.7674	0.27844	0.67532	1.32468	1.78341	0.76037	0.45622	1.18879	0.81121	0.53521	0.82629	0.46009	2.1784	0.70998	1.29002	1	0.65385	1.34615	1.25882	0.41176	2.07059	0.25882	1.29825	0.70175	1.27132	0.72868	0.31088	0.76684	0.2487	2.67358	0.43515	1.56485	1.15789
	Setracovirus	NL63-related_bat_coronavirus-BtKYNL63-9a_NC_032107	2.04894	0.24144	0.71126	0.99837	1.57491	0.42509	1.23107	0.76893	0.74644	1.25356	1.52345	0.47655	2.81154	0.14261	0.7674	0.27844	0.67532	1.32468	1.78341	0.76037	0.45622	1.18879	0.81121	0.53521	0.82629	0.46009	2.1784	0.70998	1.29002	1	0.65385	1.34615	1.25882	0.41176	2.07059	0.25882	1.29825	0.70175	1.27132	0.72868	0.31088	0.76684	0.2487	2.67358	0.43515	1.56485	1.15789
	Setracovirus	NL63-related_bat_coronavirus-BtKYNL63-9b_KY073745	1.93808	0.32198	0.89783	0.84211	1.47183	0.52817	1.09827	0.90173	1.0884	0.9116	1.44592	0.55408	2.64452	0.2392	0.81728	0.299	0.80723	1.19277	1.62143	0.73571	0.64286	0.88485	1.11515	0.34238	0.75992	0.76827	2.12944	0.48315	1.51685	1	0.90421	1.09579	1.18598	0.80863	1.73585	0.26954	1.05185	0.94815	0.88679	1.11321	0.31034	1.05172	0.31034	2.32759	0.53271	1.46729	0.88787
	Setracovirus	NL63-related_bat_coronavirus-BtKYNL63-9b_NC_048216	1.93808	0.32198	0.89783	0.84211	1.47183	0.52817	1.09827	0.90173	1.0884	0.9116	1.44592	0.55408	2.64452	0.2392	0.81728	0.299	0.80723	1.19277	1.62143	0.73571	0.64286	0.88485	1.11515	0.34238	0.75992	0.76827	2.12944	0.48315	1.51685	1	0.90421	1.09579	1.18598	0.80863	1.73585	0.26954	1.05185	0.94815	0.88679	1.11321	0.31034	1.05172	0.31034	2.32759	0.53271	1.46729	0.88787
	Setracovirus	Rousettus_aegyptiacus_bat_coronavirus_229E-related_5425_MN611517	2.16478	0.17447	0.51696	1.14378	1.35862	0.64138	1.2314	0.7686	0.70461	1.29539	1.51111	0.48889	2.63448	0.08276	0.76552	0.51724	0.59355	1.40645	1.83151	0.64333	0.52516	1.17996	0.82004	0.7619	0.55138	0.6015	2.08521	0.66332	1.33668	1	0.69549	1.30451	1.44548	0.33645	1.96885	0.24922	1.2069	0.7931	1.56589	0.43411	0.35714	0.90476	0.21429	2.52381	0.54148	1.45852	1.2241
	Setracovirus	BtCoV_AT1AF1_Hip_aba_GHA_2010_KT253272	2.2084	0.26128	0.47278	1.05754	1.37086	0.62914	1.26357	0.73643	0.73879	1.26121	1.57774	0.42226	2.6252	0.17021	0.79869	0.40589	0.5697	1.4303	1.7409	0.74518	0.51392	1.09021	0.90979	0.64838	0.56858	0.54863	2.23441	0.69154	1.30846	1	0.72059	1.27941	1.18293	0.31707	2.17073	0.32927	1.14085	0.85915	1.41892	0.58108	0.33684	0.94737	0.14737	2.56842	0.50644	1.49356	1.08844
	Setracovirus	BtCoV_FO1AF2_Hip_aba_GHA_2010_KT253270	2.10224	0.21725	0.51757	1.16294	1.43357	0.56643	1.32669	0.67331	0.69496	1.30504	1.57339	0.42661	2.73756	0.10292	0.70669	0.45283	0.55346	1.44654	1.82096	0.78603	0.39301	1.13858	0.86142	0.65796	0.56397	0.53264	2.24543	0.75253	1.24747	1	0.6705	1.3295	1.28254	0.31746	2.19683	0.20317	1.24088	0.75912	1.56204	0.43796	0.3908	1.01149	0.11494	2.48276	0.43621	1.56379	1.21412
	Setracovirus	BtCoV_KW2E-F151_Hip_cf__rub_GHA_2011_KT253269	2.08889	0.24127	0.48254	1.1873	1.41176	0.58824	1.28175	0.71825	0.656	1.344	1.51953	0.48047	2.72109	0.14966	0.71429	0.41497	0.5125	1.4875	1.81046	0.81046	0.37908	1.11194	0.88806	0.61697	0.60668	0.64781	2.12853	0.70558	1.29442	1	0.64122	1.35878	1.28662	0.33121	2.16561	0.21656	1.14182	0.85818	1.54412	0.45588	0.4186	0.97674	0.16279	2.44186	0.44726	1.55274	1.16432
	Setracovirus	BtCoV_KW2E-F56_Hip_cf__rub_GHA_2011_KT253271	1.96641	0.31145	0.65344	1.0687	1.39355	0.60645	1.22411	0.77589	0.94678	1.05322	1.57515	0.42485	2.5792	0.1856	0.8832	0.352	0.59756	1.40244	1.77978	0.83596	0.38427	0.88317	1.11683	0.56693	0.54593	0.74541	2.14173	0.62763	1.37237	1	0.70544	1.29456	1.21791	0.34627	1.92239	0.51343	0.98551	1.01449	1.26897	0.73103	0.38647	1.0628	0.34783	2.2029	0.58015	1.41985	1.01357
	Setracovirus	BtKY229E-1_KY073747	2.11039	0.17532	0.50649	1.20779	1.53846	0.46154	1.33597	0.66403	0.55647	1.44353	1.62963	0.37037	2.77249	0.0776	0.6843	0.46561	0.54857	1.45143	1.85656	0.74385	0.39959	1.20295	0.79705	0.73684	0.51579	0.62105	2.12632	0.75181	1.24819	1	0.63925	1.36075	1.43492	0.26667	2.12063	0.17778	1.28467	0.71533	1.49618	0.50382	0.31707	0.85366	0.21951	2.60976	0.47934	1.52066	1.34259
	Setracovirus	BtKY229E-8_KY073748	2.06742	0.21188	0.57143	1.14928	1.42662	0.57338	1.32245	0.67755	0.66667	1.33333	1.50988	0.49012	2.56552	0.15862	0.78621	0.48966	0.57143	1.42857	1.80392	0.70588	0.4902	1.1243	0.8757	0.67005	0.57868	0.73096	2.0203	0.70762	1.29238	1	0.64662	1.35338	1.33739	0.43769	1.99392	0.231	1.19031	0.80969	1.50376	0.49624	0.51765	0.84706	0.28235	2.35294	0.51261	1.48739	1.1619
[truncated: 14 more columns]
